# Supplementary material for: Design, Synthesis, DFT Study and Antifungal Activity of Pyrazolecarboxamide Derivatives
Source: PubMed Central journal article supplement (PMC6274113; doi:10.3390/molecules21010068), 2016-01-08
Supplement: molecules-21-00068-s001.pdf [file molecules-21-00068-s001.pdf]

# Supplementary Materials: Design, Synthesis, DFT Study and Antifungal Activity of Pyrazolecarboxamide Derivatives

Jin-Xia Mu, Yan-Xia Shi, Ming-Yan Yang, Zhao-Hui Sun, Xing-Hai Liu, Bao-Ju Li and Na-Bo Sun

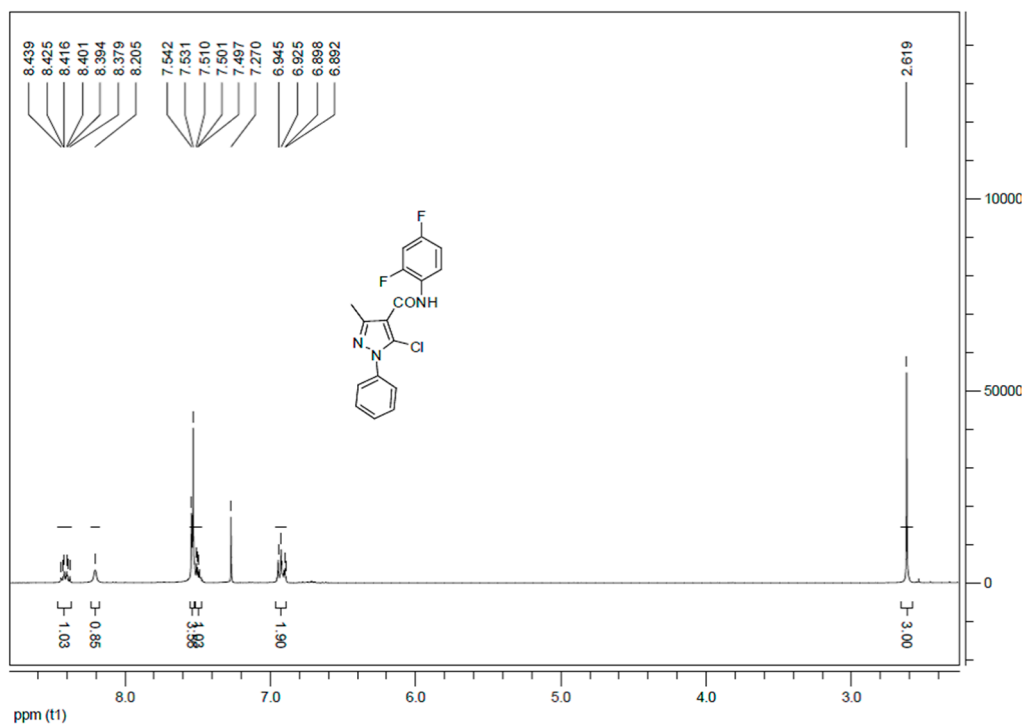

Figure S1. <sup>1</sup>H-NMR spectrum of compound 5a.

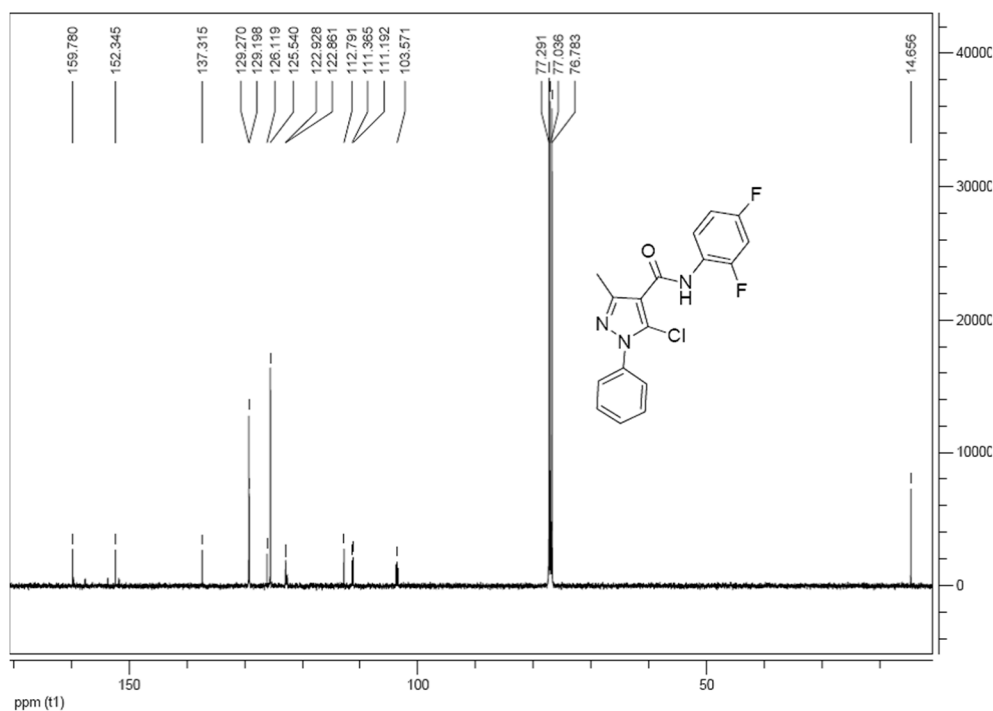

Figure S2. <sup>13</sup>C-NMR spectrum of compound 5a.

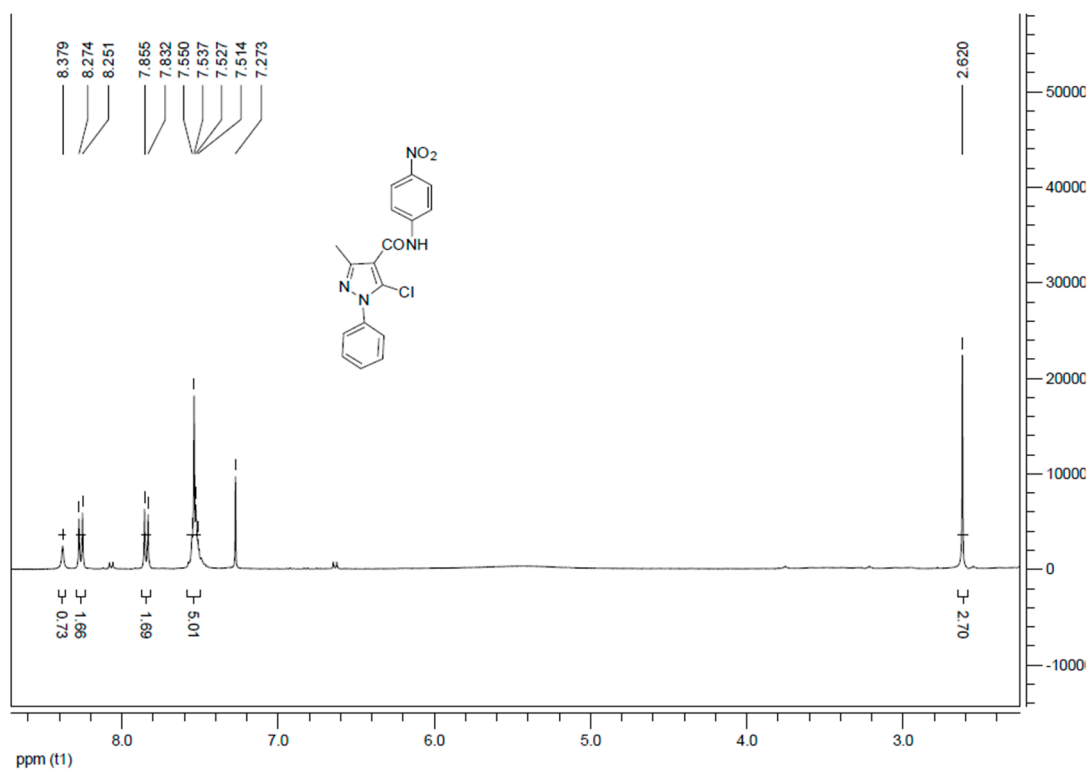Figure S3. <sup>1</sup>H-NMR spectrum of compound 5b.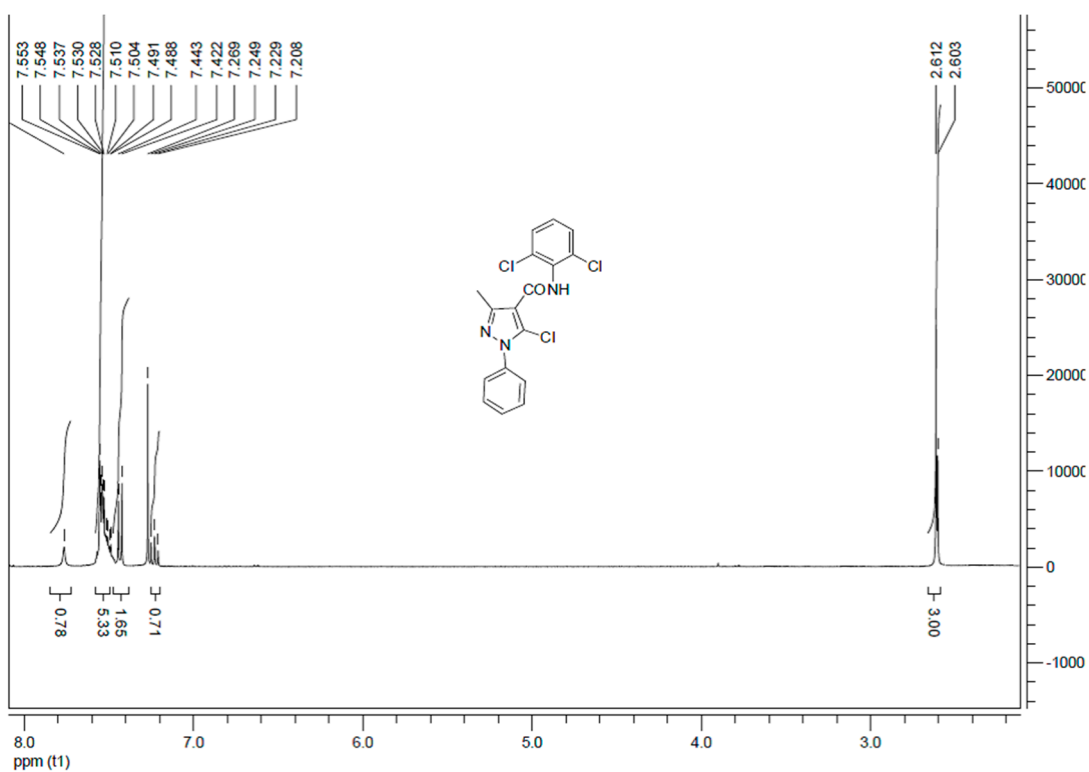Figure S4. <sup>1</sup>H-NMR spectrum of compound 5c.

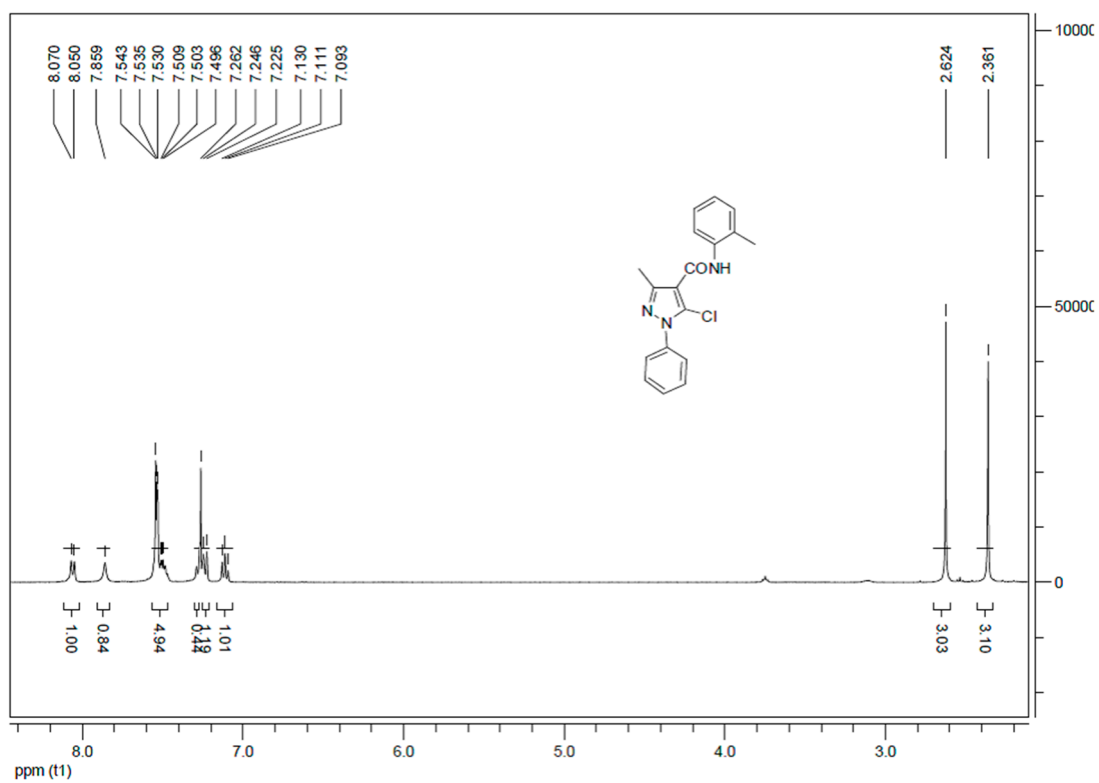Figure S5. <sup>1</sup>H-NMR spectrum of compound 5d.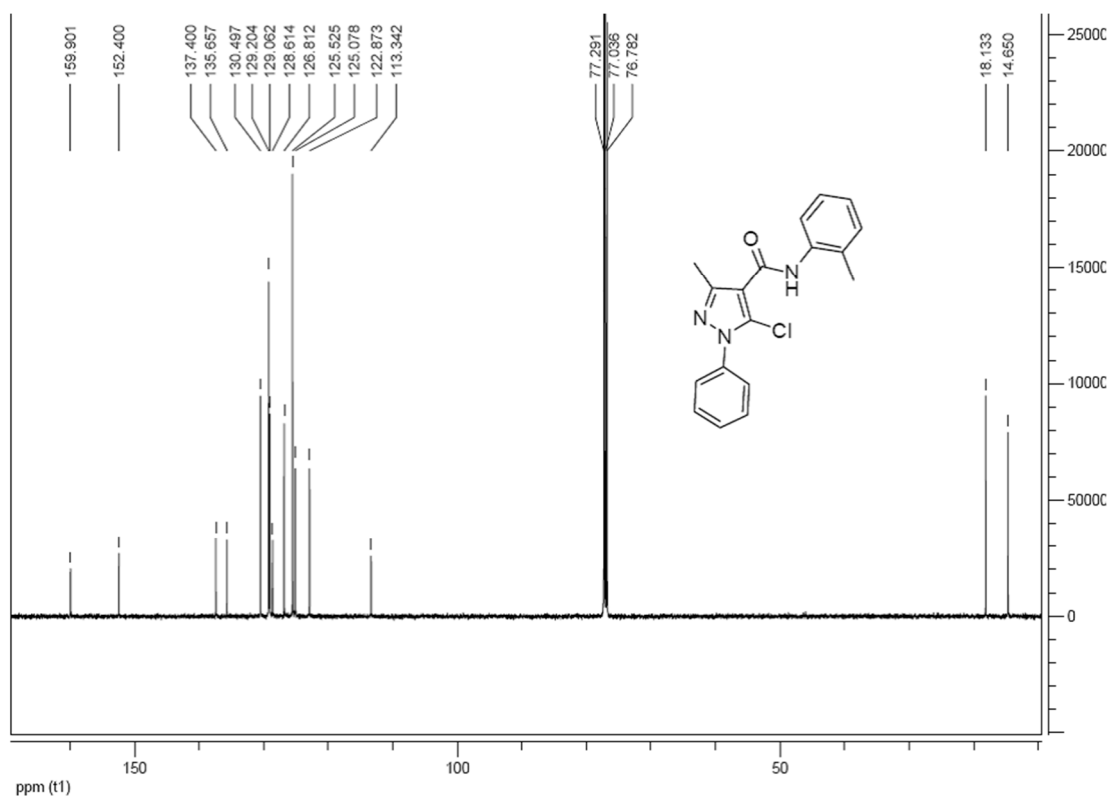Figure S6. <sup>13</sup>C-NMR spectrum of compound 5d.

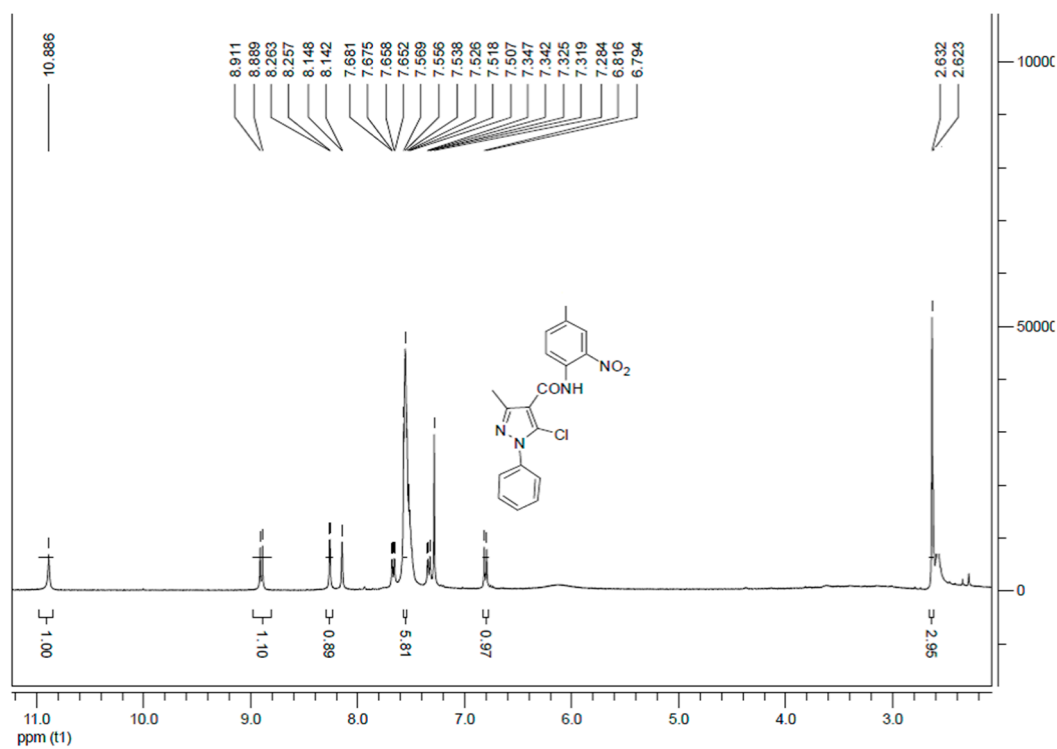Figure S7. <sup>1</sup>H-NMR spectrum of compound 5e.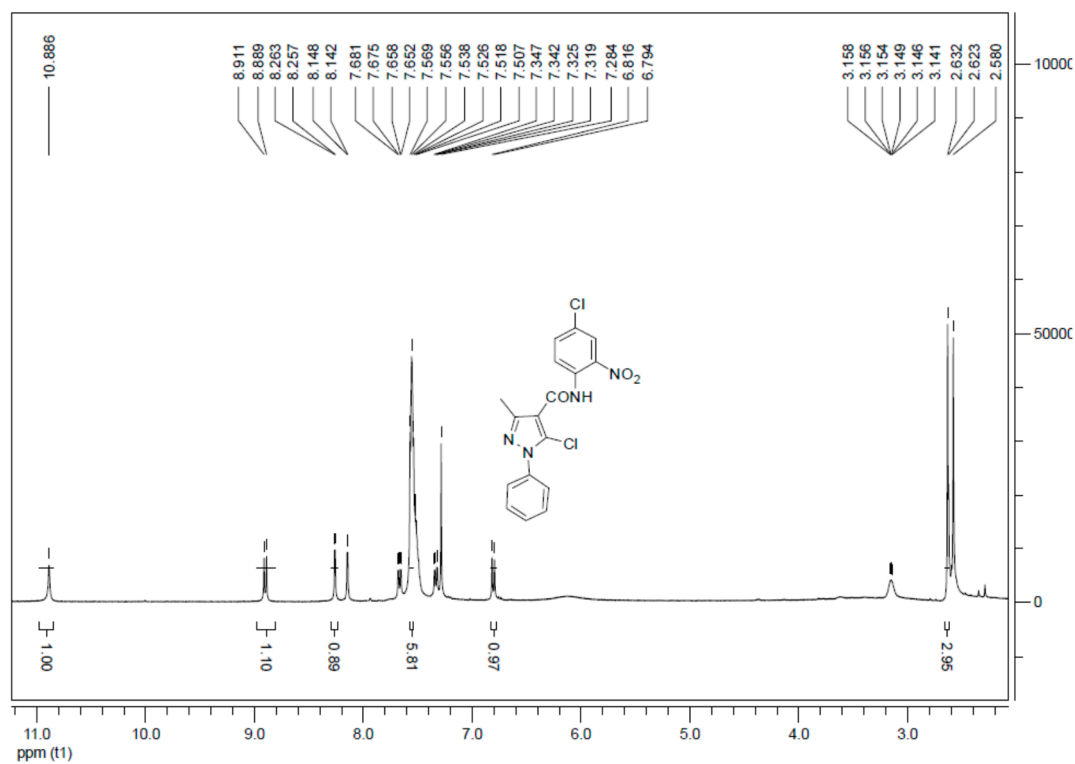Figure S8. <sup>1</sup>H-NMR spectrum of compound 5f.

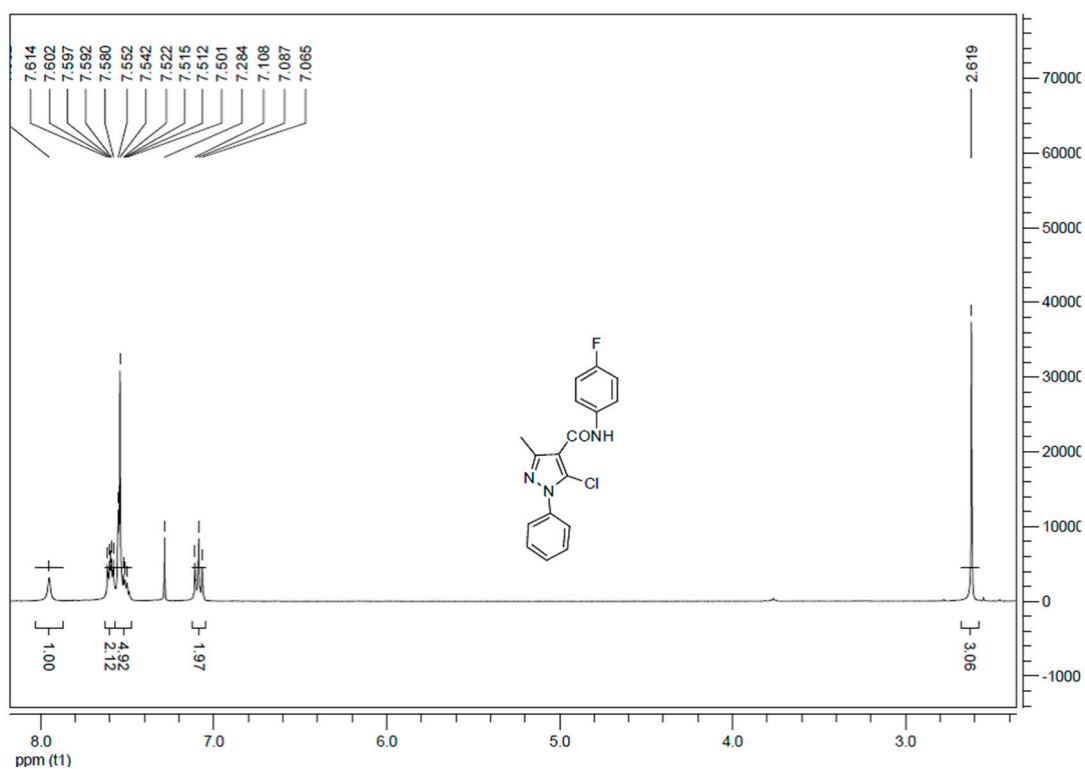Figure S9. <sup>1</sup>H-NMR spectrum of compound 5g.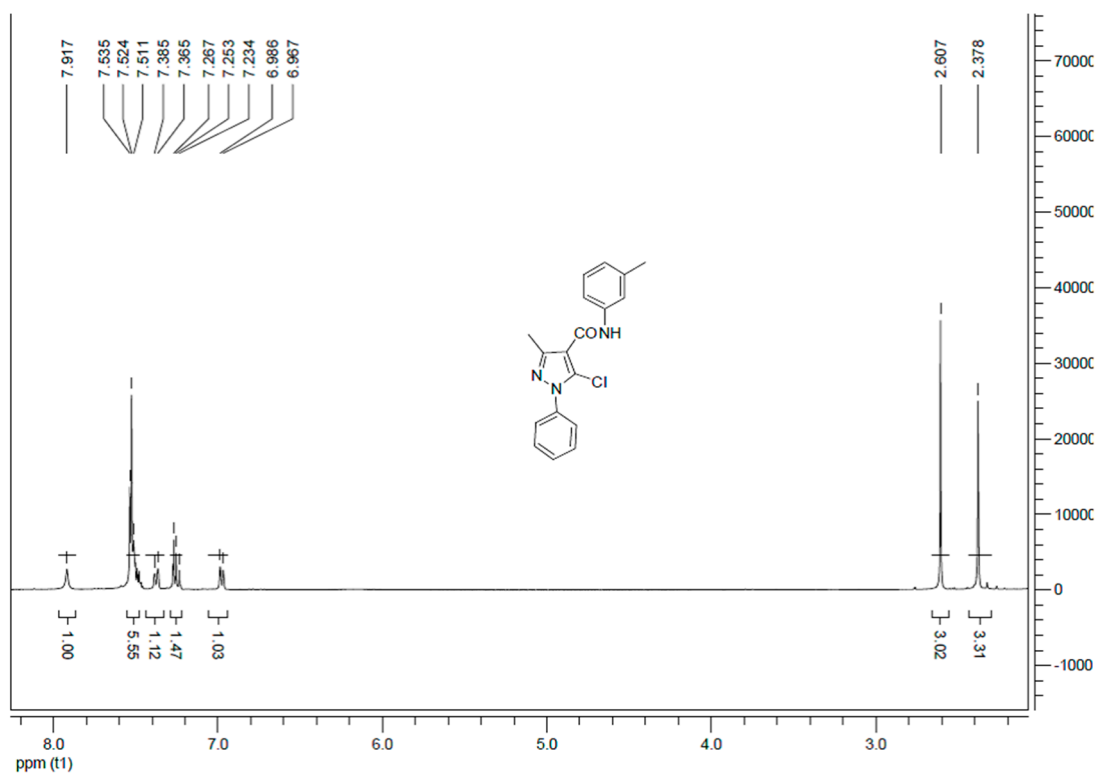Figure S10. <sup>1</sup>H-NMR spectrum of compound 5h.

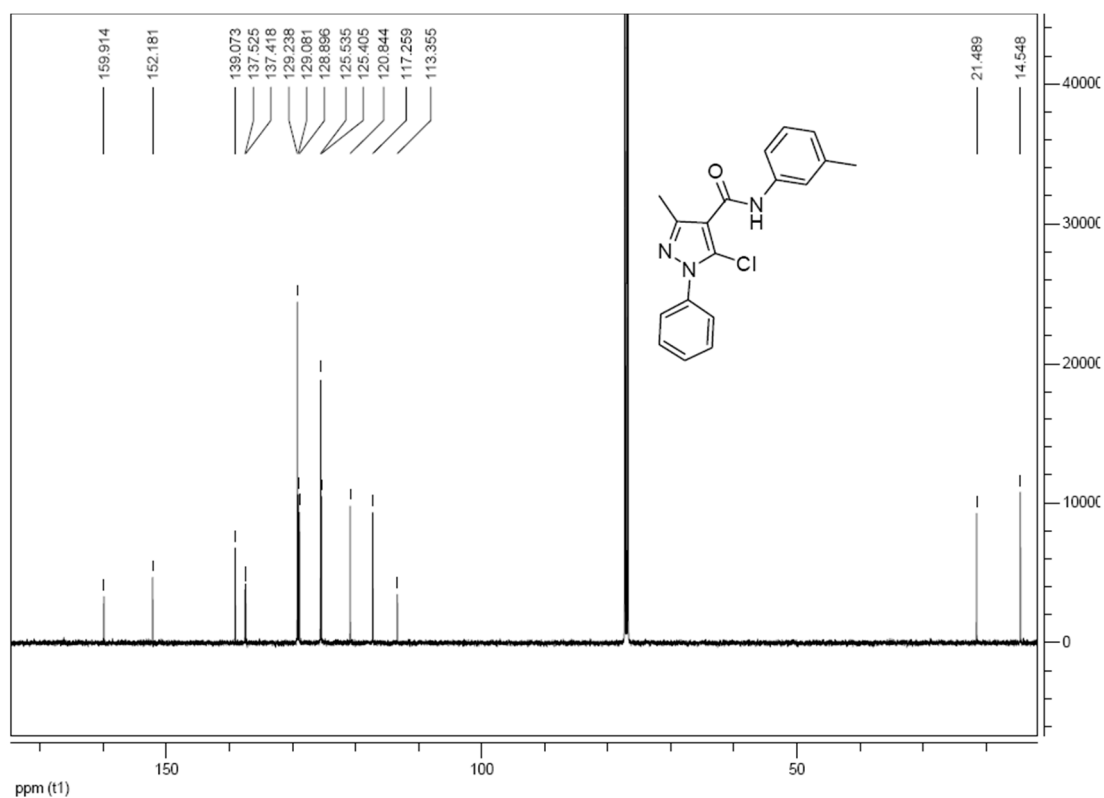Figure S11. <sup>13</sup>C-NMR spectrum of compound 5h.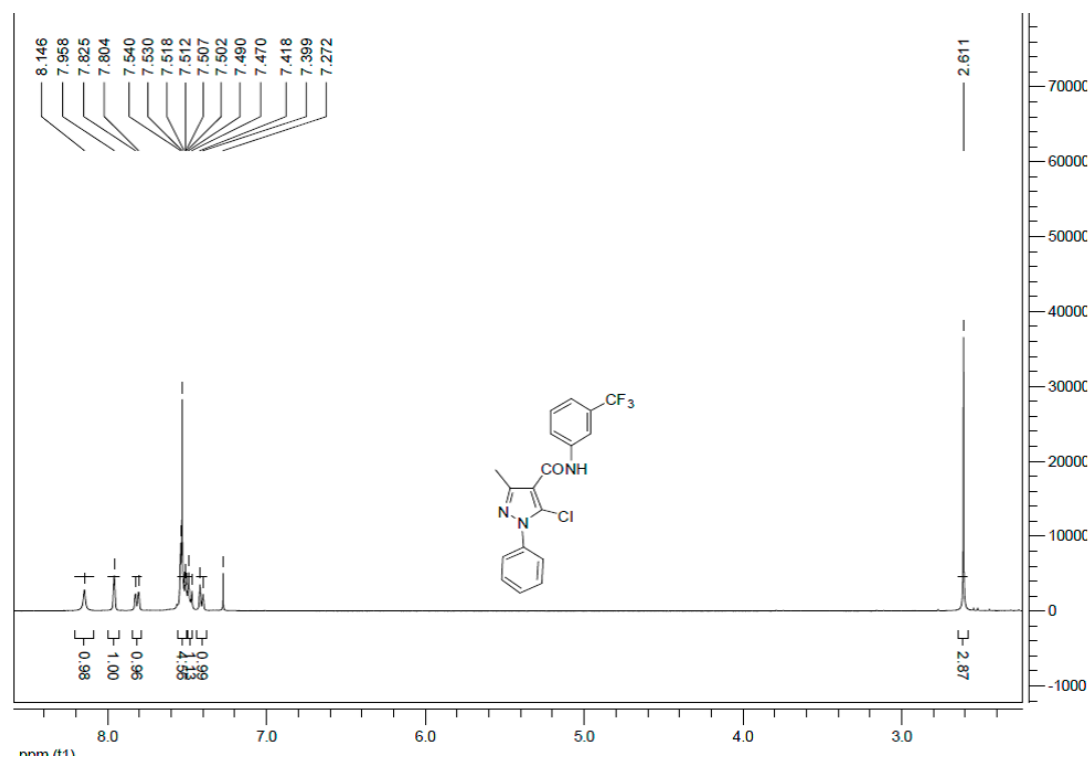Figure S12. <sup>1</sup>H-NMR spectrum of compound 5i.

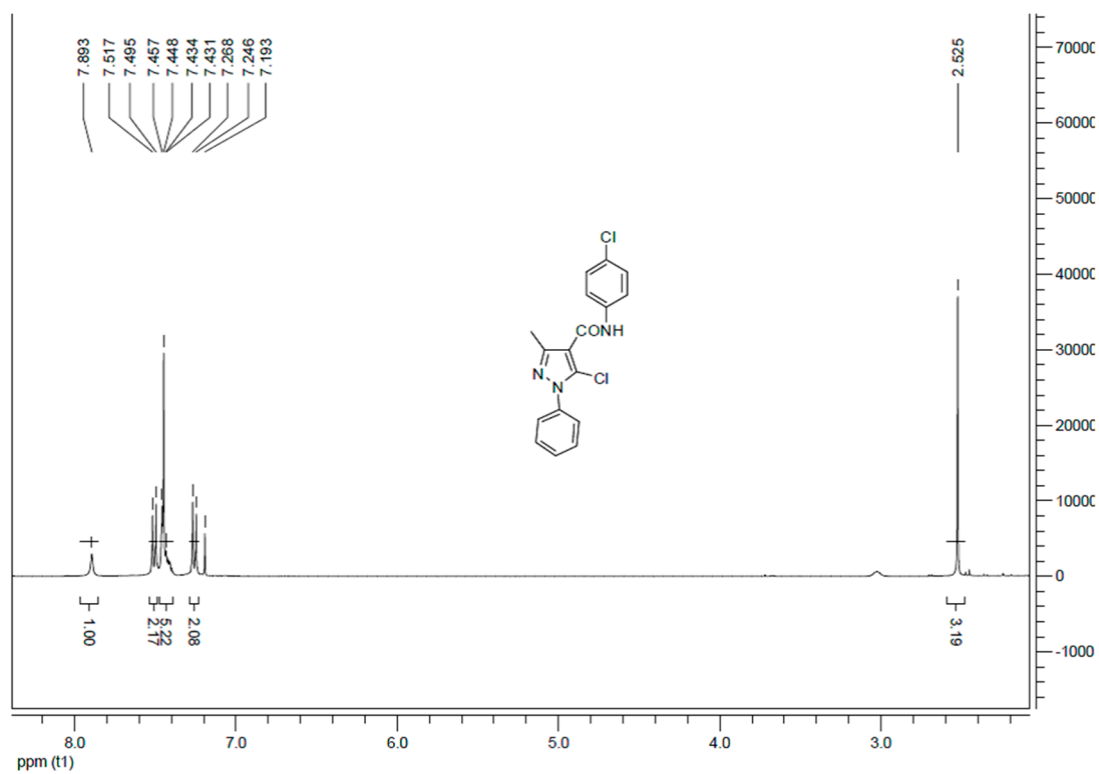Figure S13. <sup>1</sup>H-NMR spectrum of compound 5j.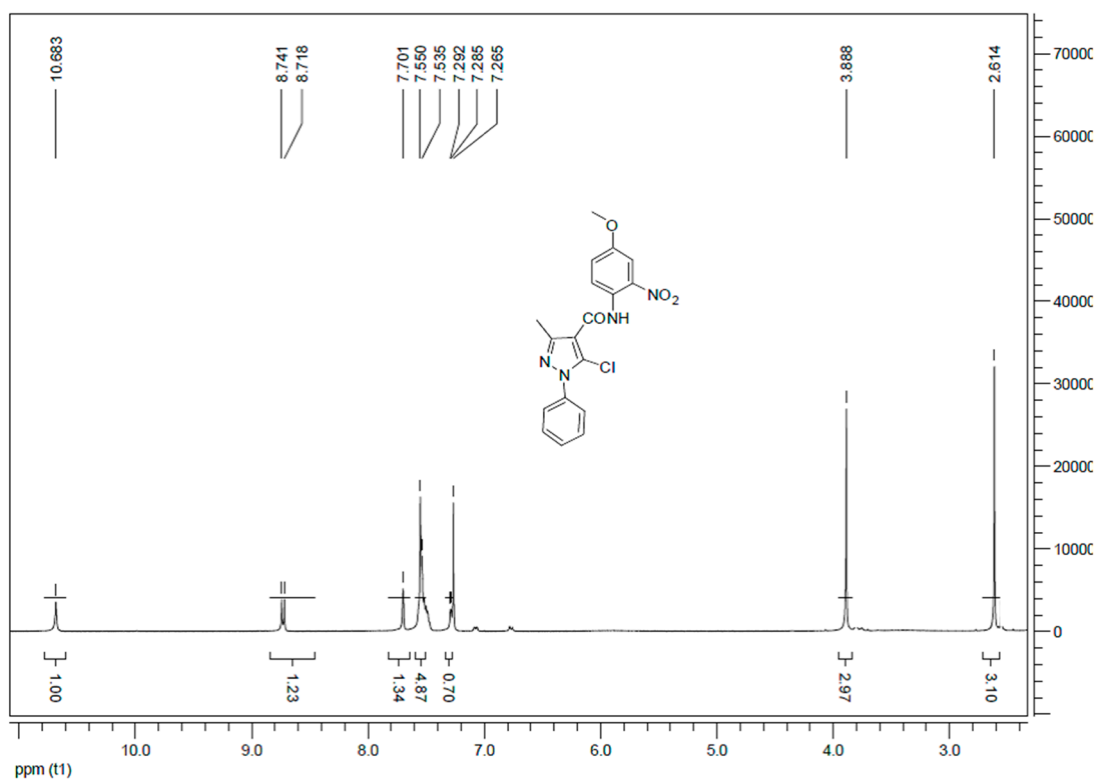Figure S14. <sup>1</sup>H-NMR spectrum of compound 5k.

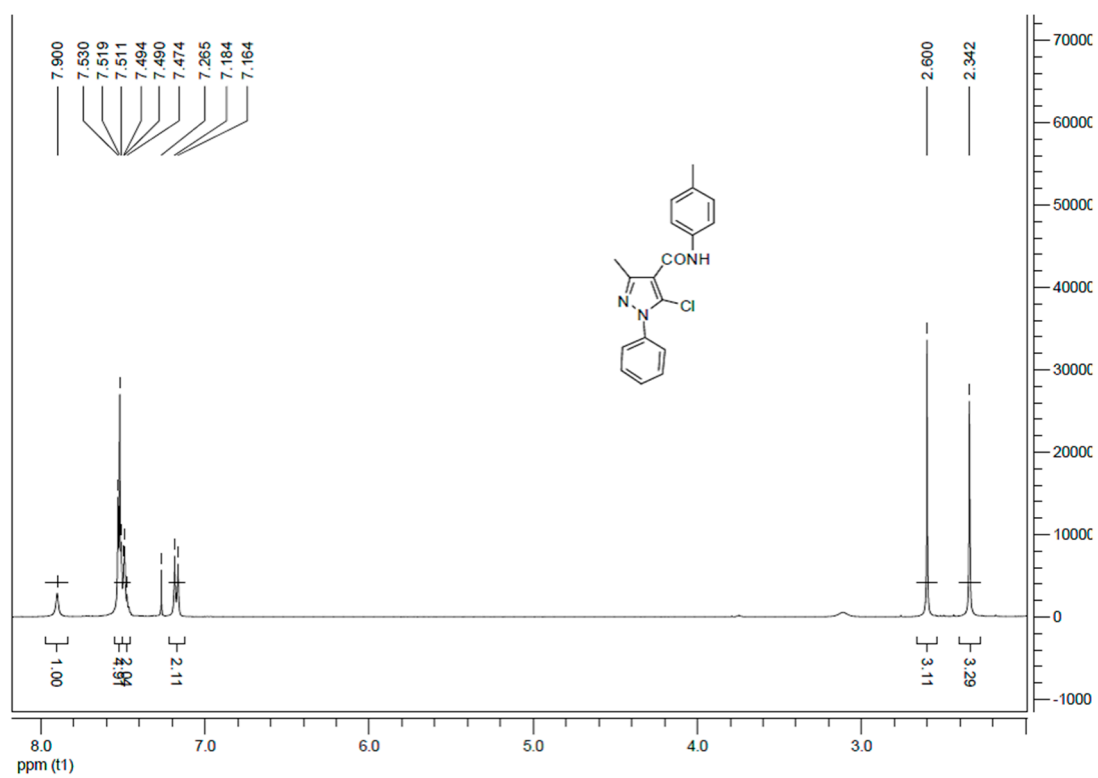Figure S15. <sup>1</sup>H-NMR spectrum of compound 5l.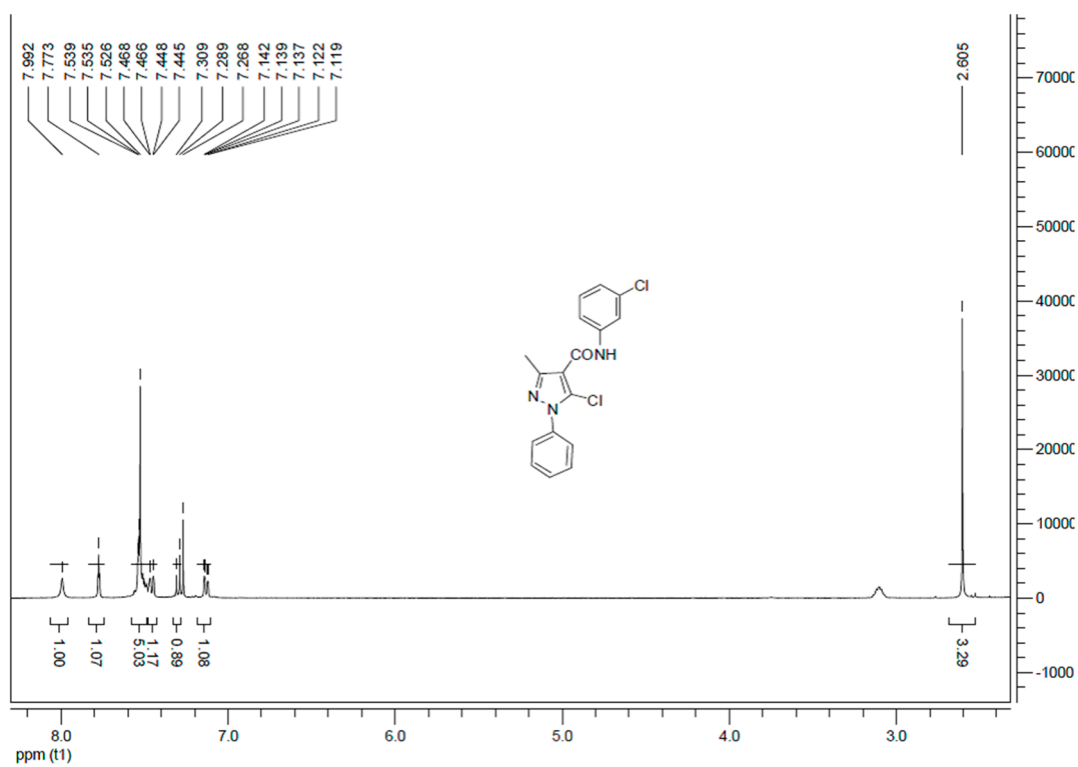Figure S16. <sup>1</sup>H-NMR spectrum of compound 5m.



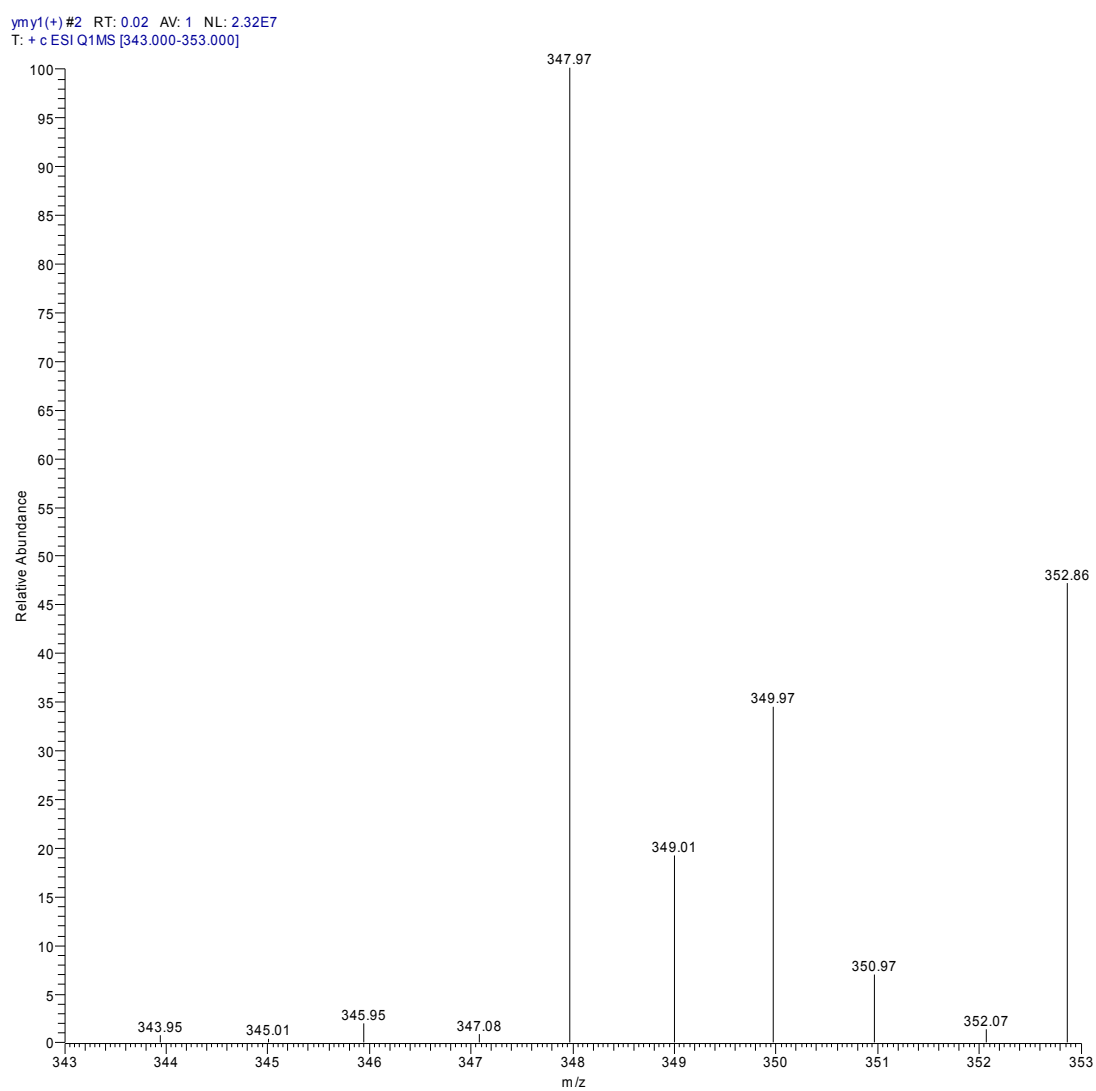

Figure S17. MS spectrum of compound 5a (+).

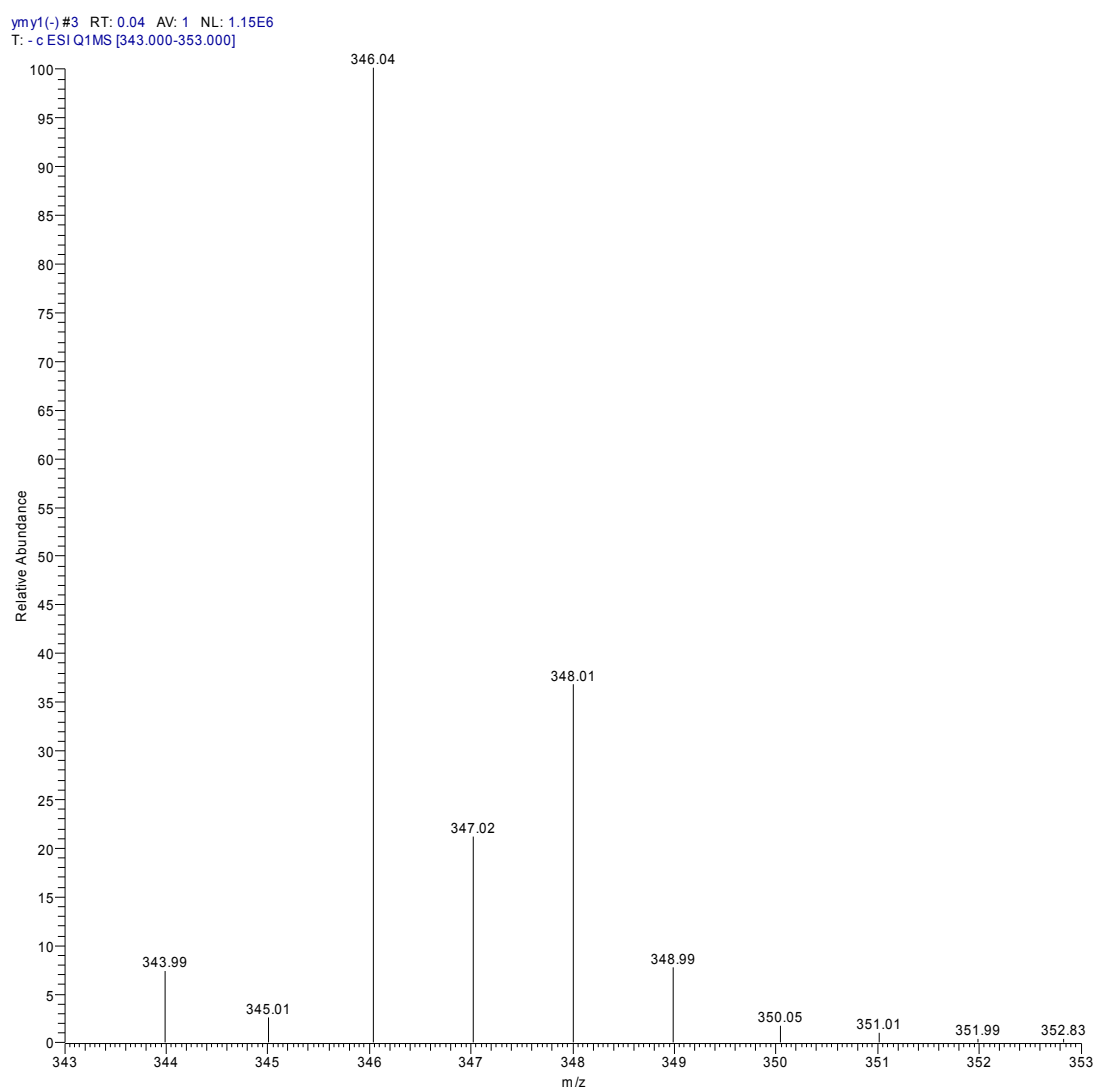

Figure S18. MS spectrum of compound 5a (-).

ymy2(+)#3 RT: 0.04 AV: 1 NL: 1.44E7  
T: + c ESI Q1MS [350.000-360.000]

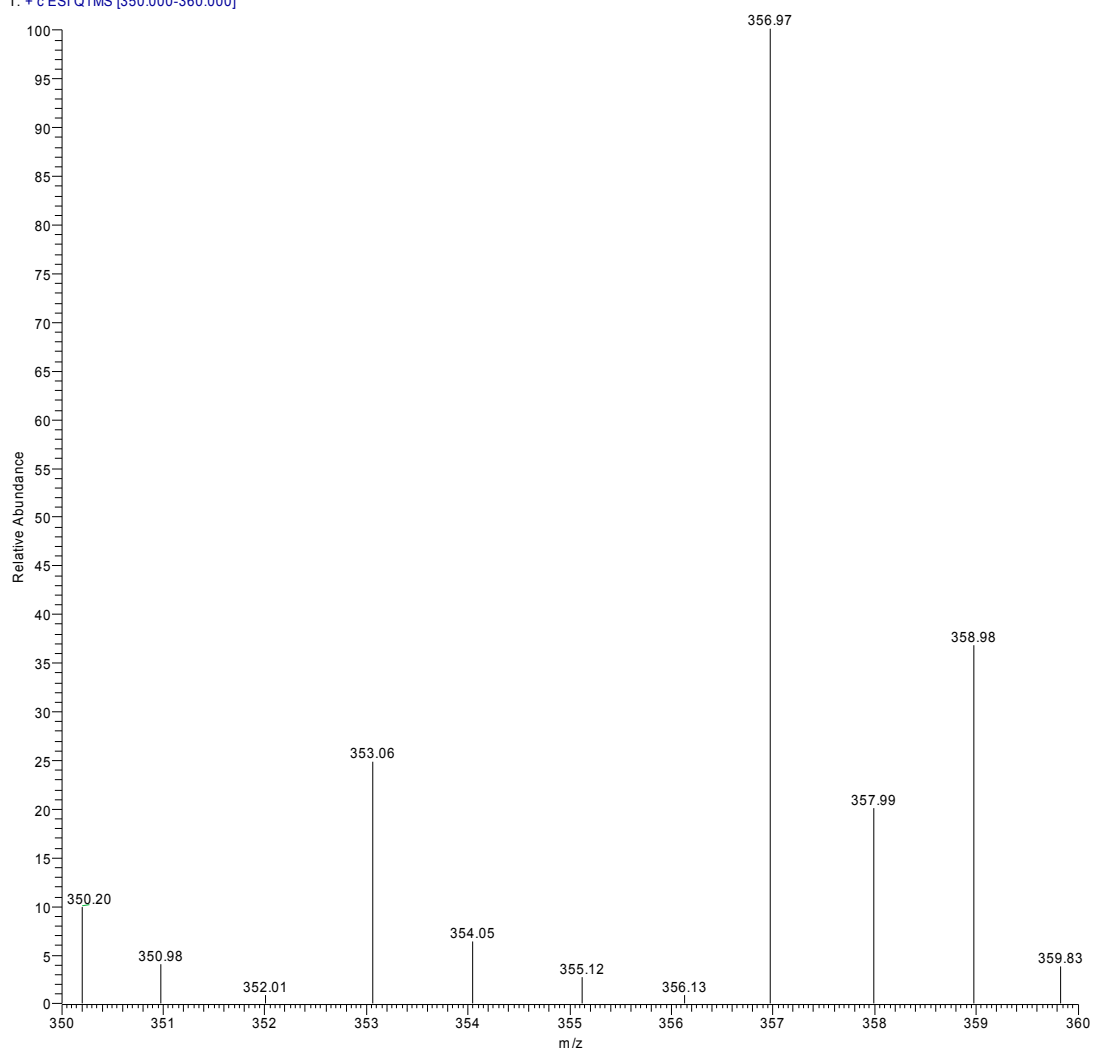

Figure S19. MS spectrum of compound 5b (+).

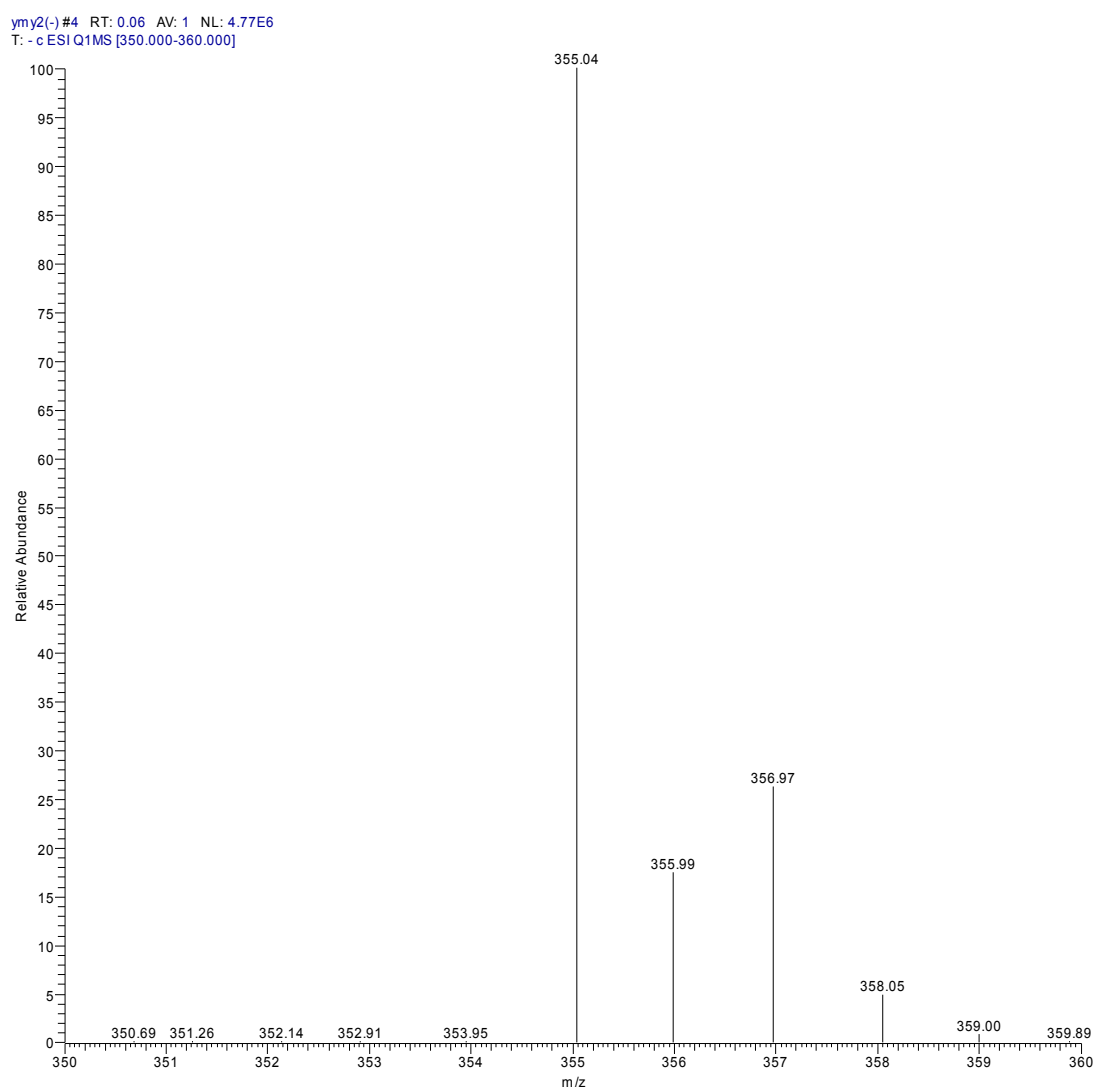

Figure S20. MS spectrum of compound **5b** (-).

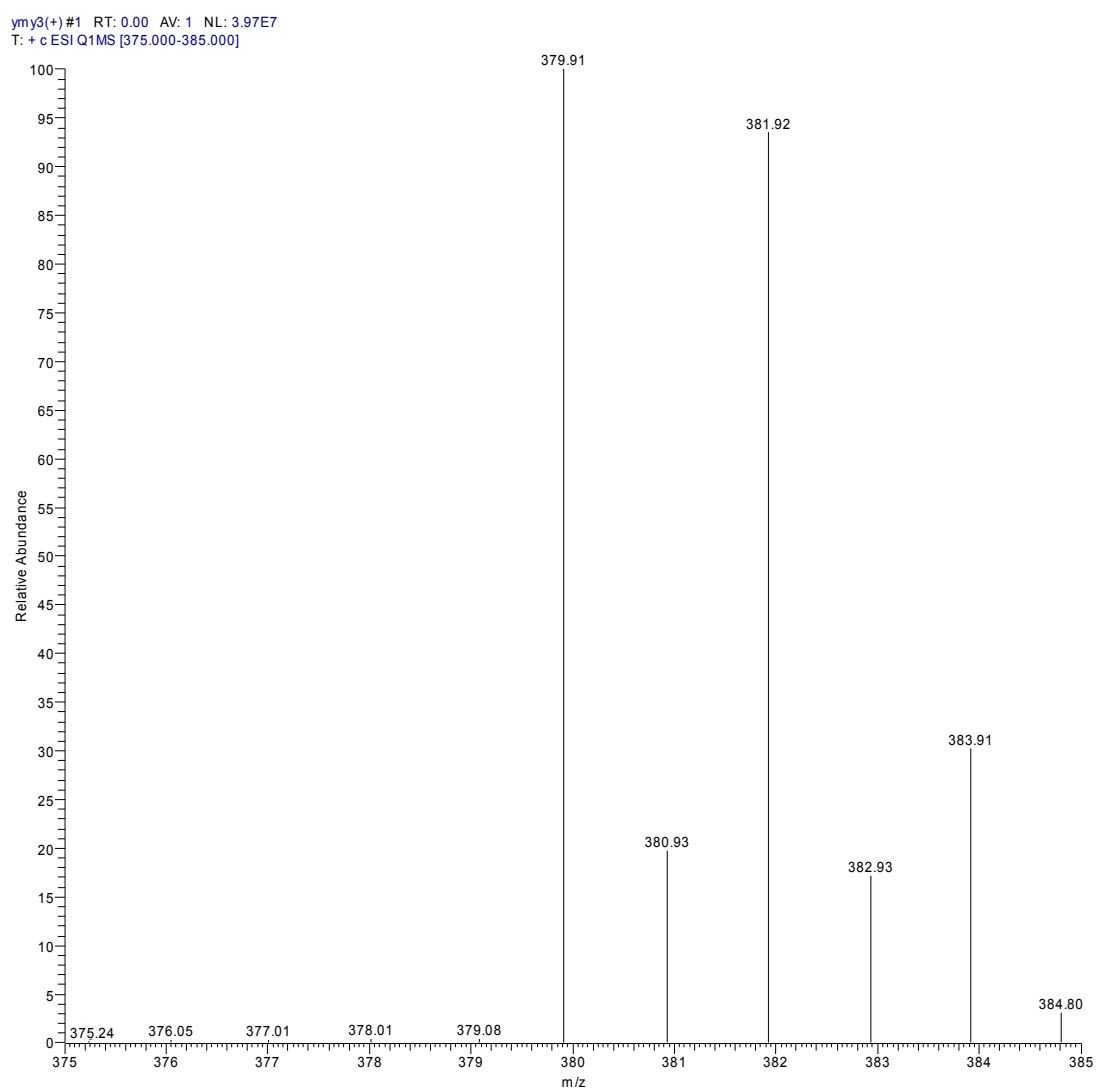

Figure S21. MS spectrum of compound 5c (+).

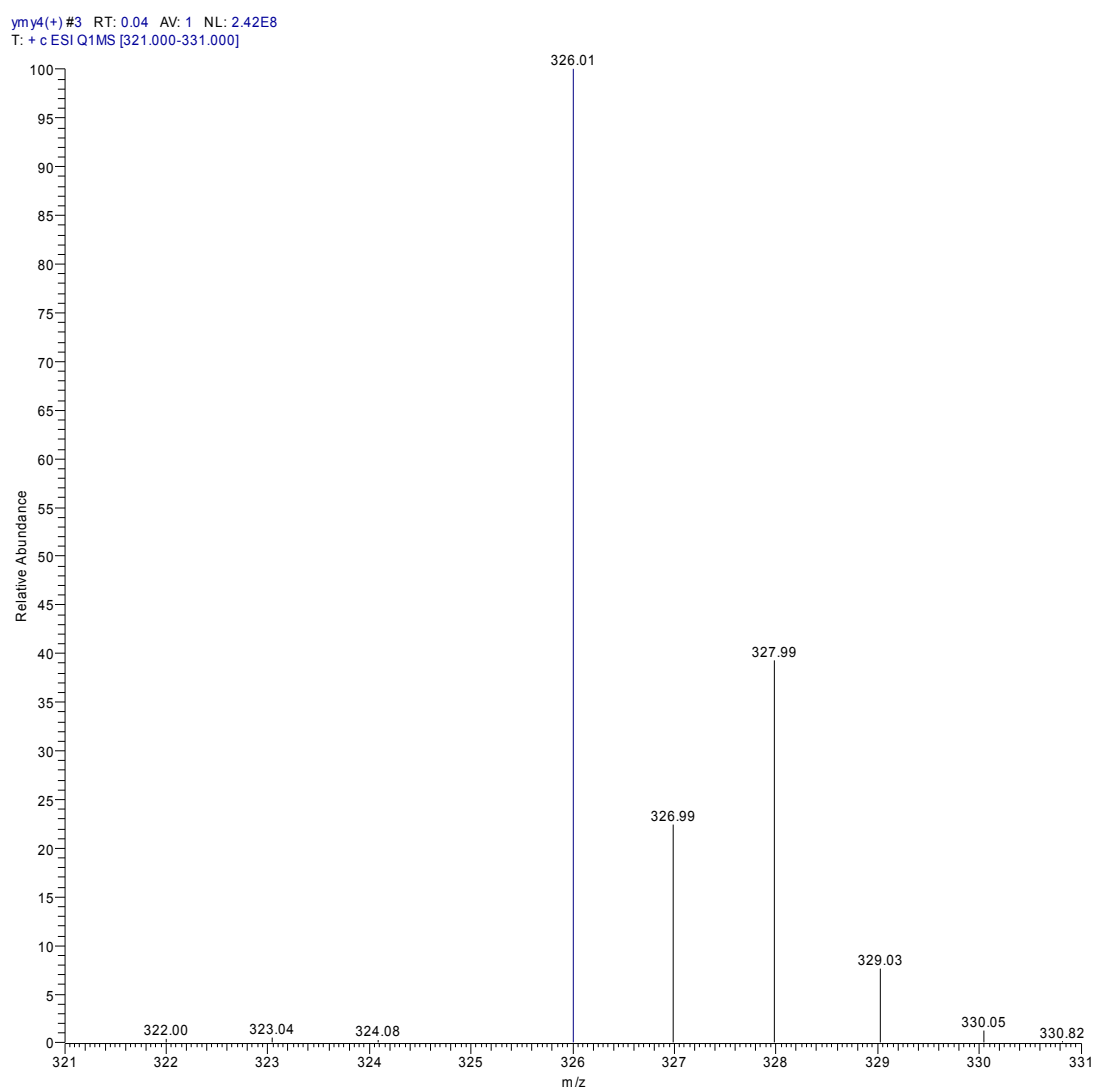

Figure S22. MS spectrum of compound 5d (+).

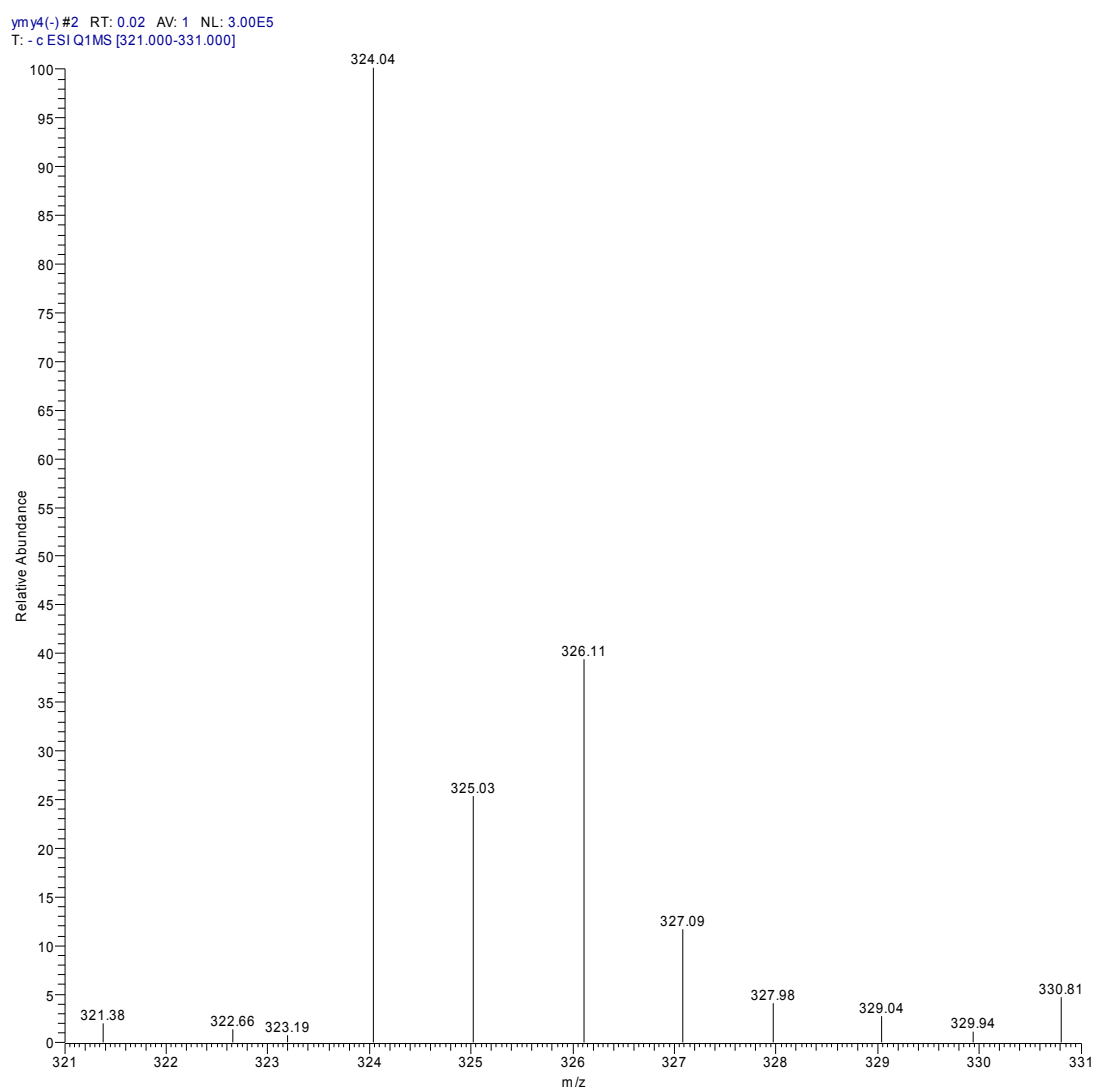

Figure S23. MS spectrum of compound 5d (-).

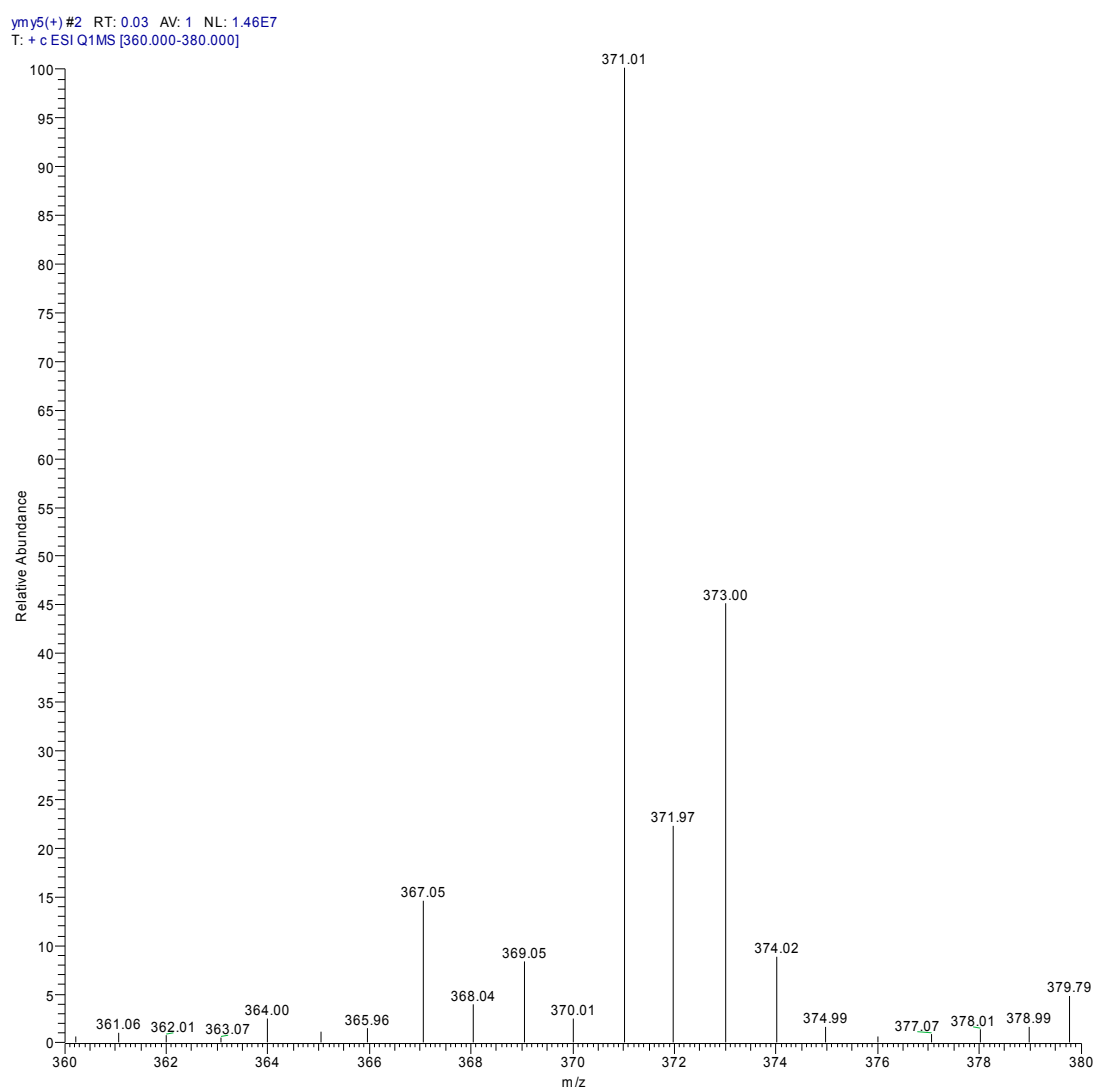

Figure S24. MS spectrum of compound 5e (+).



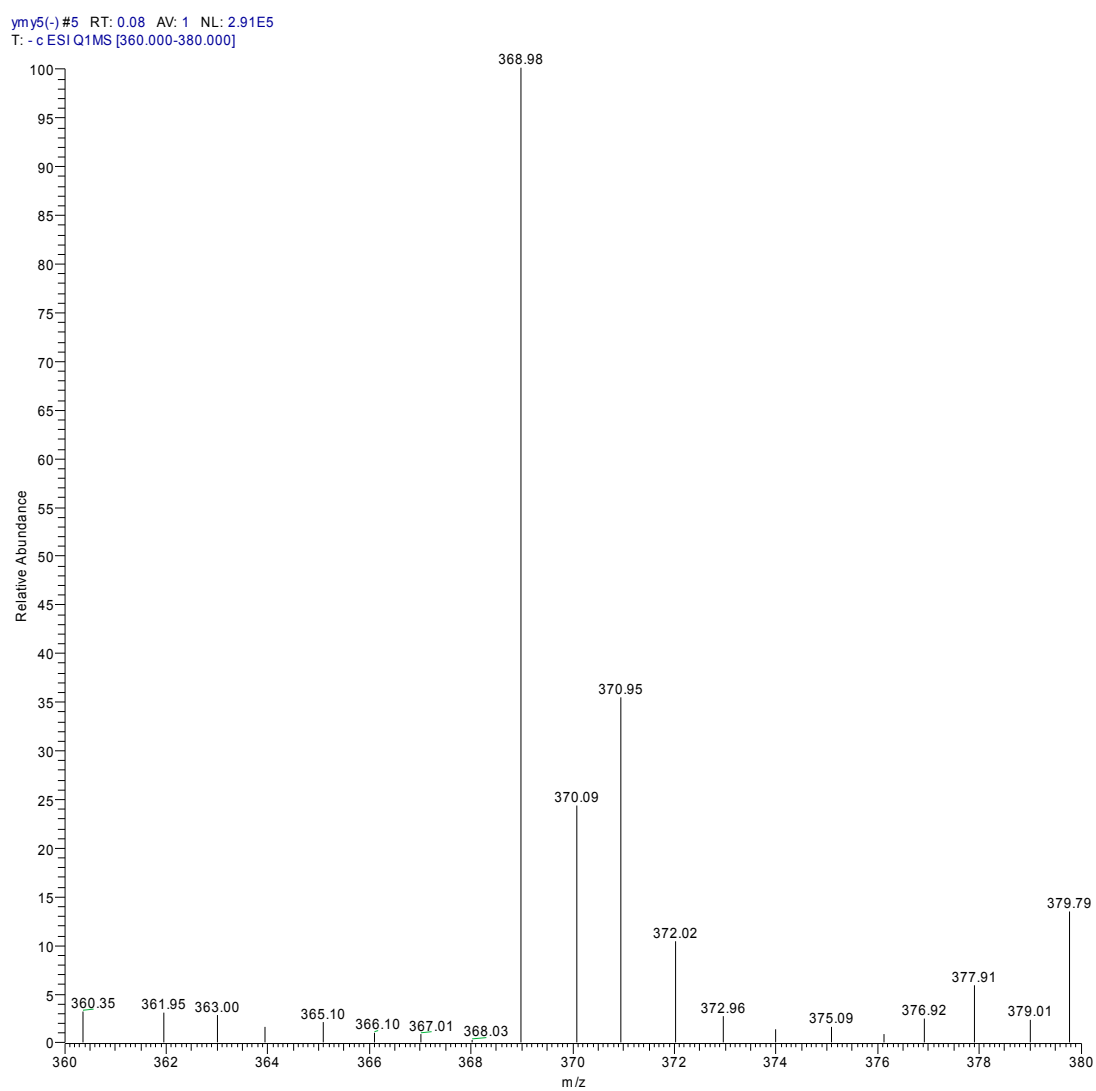

Figure S25. MS spectrum of compound 5e (-).

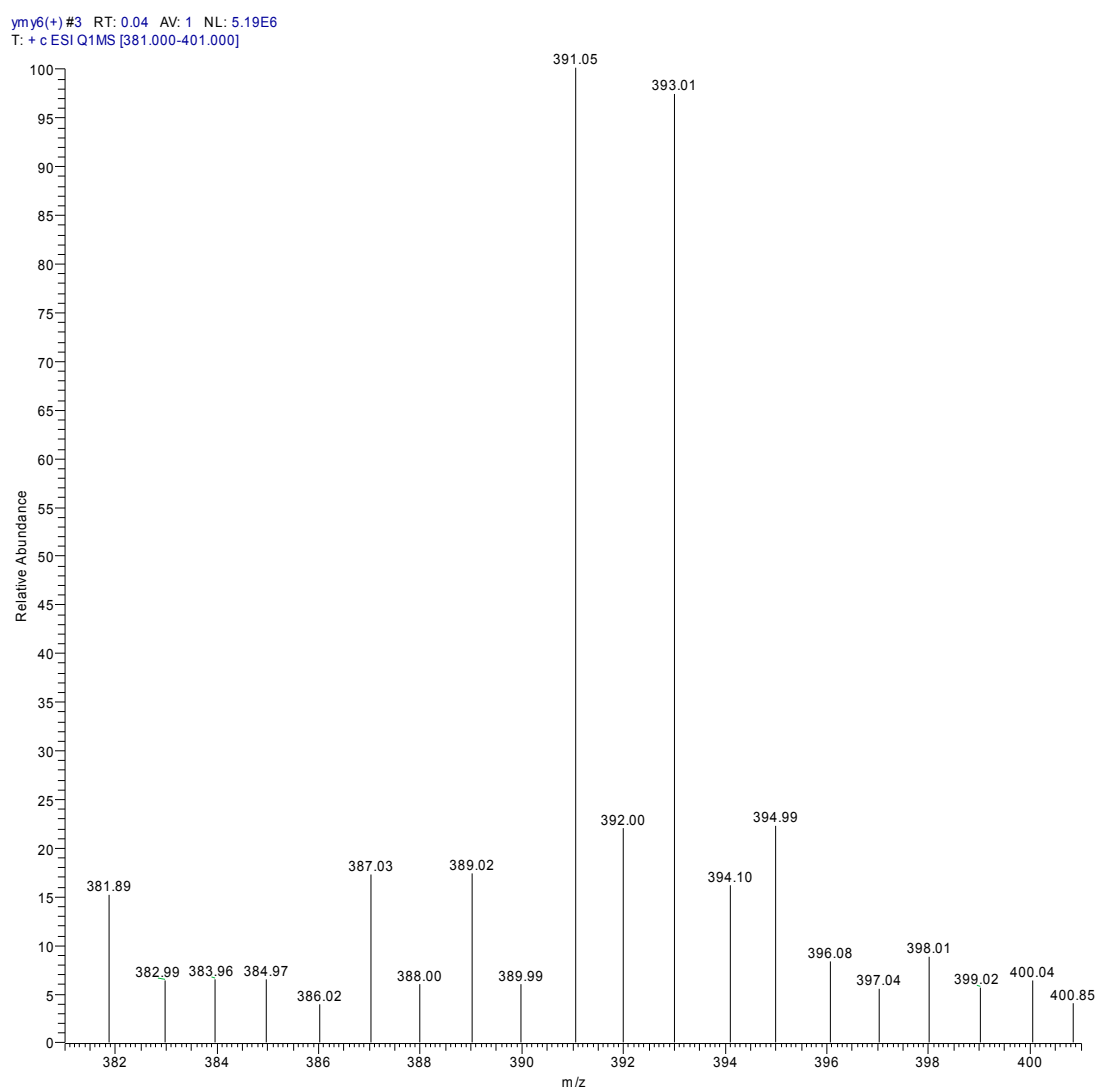

Figure S26. MS spectrum of compound 5f (+).

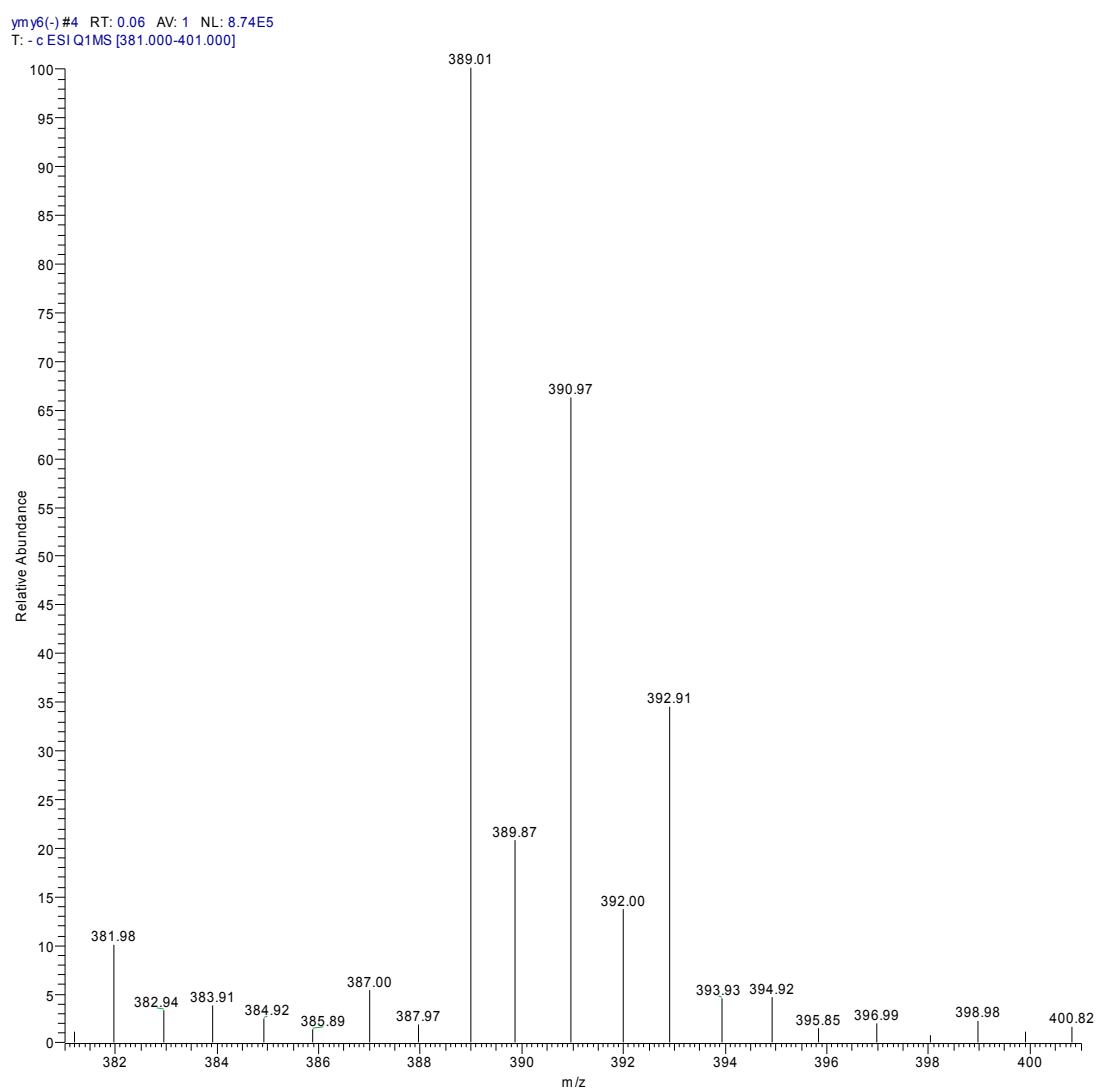

Figure S27. MS spectrum of compound 5f (-).

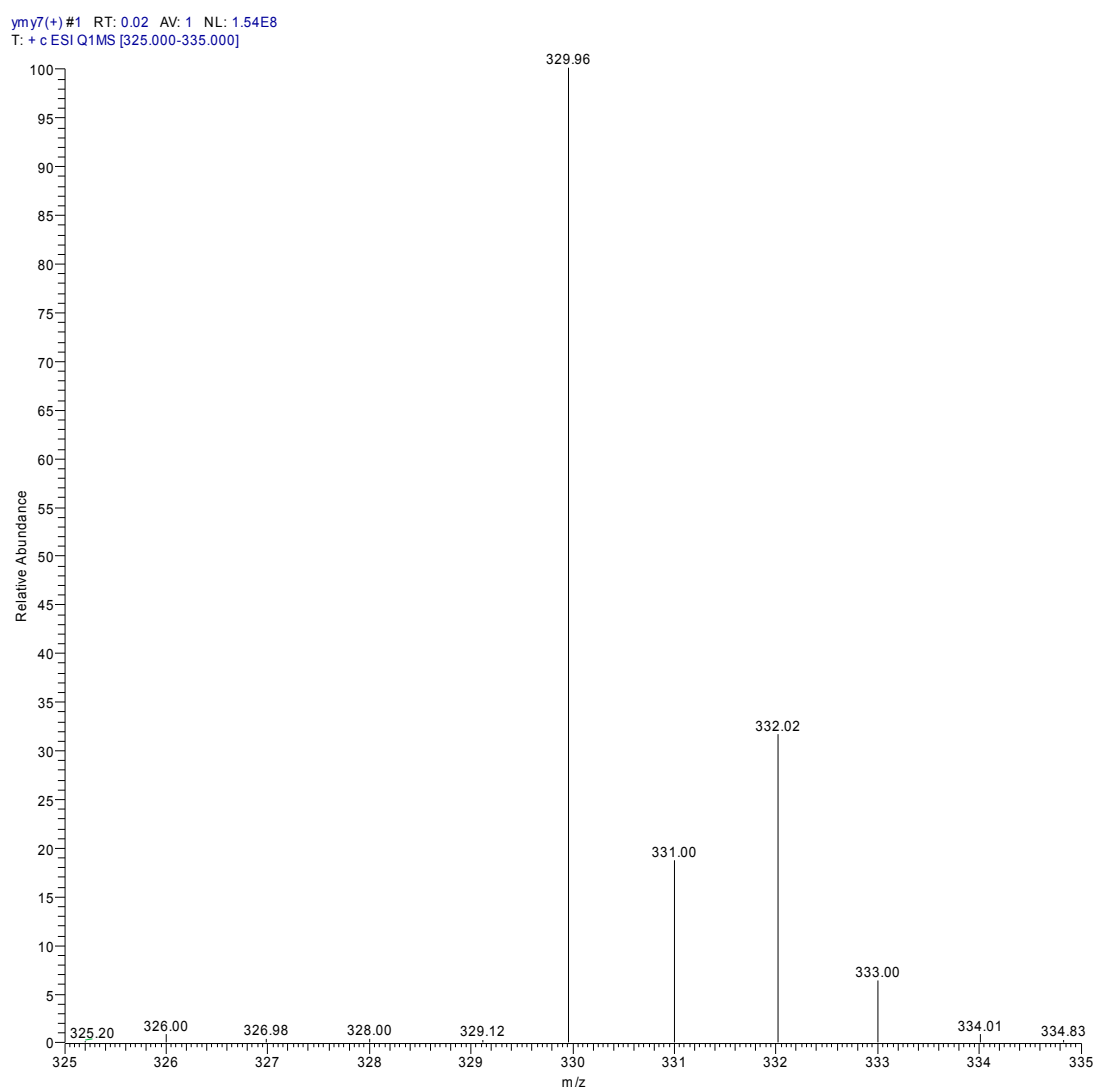

Figure S28. MS spectrum of compound 5g (+).

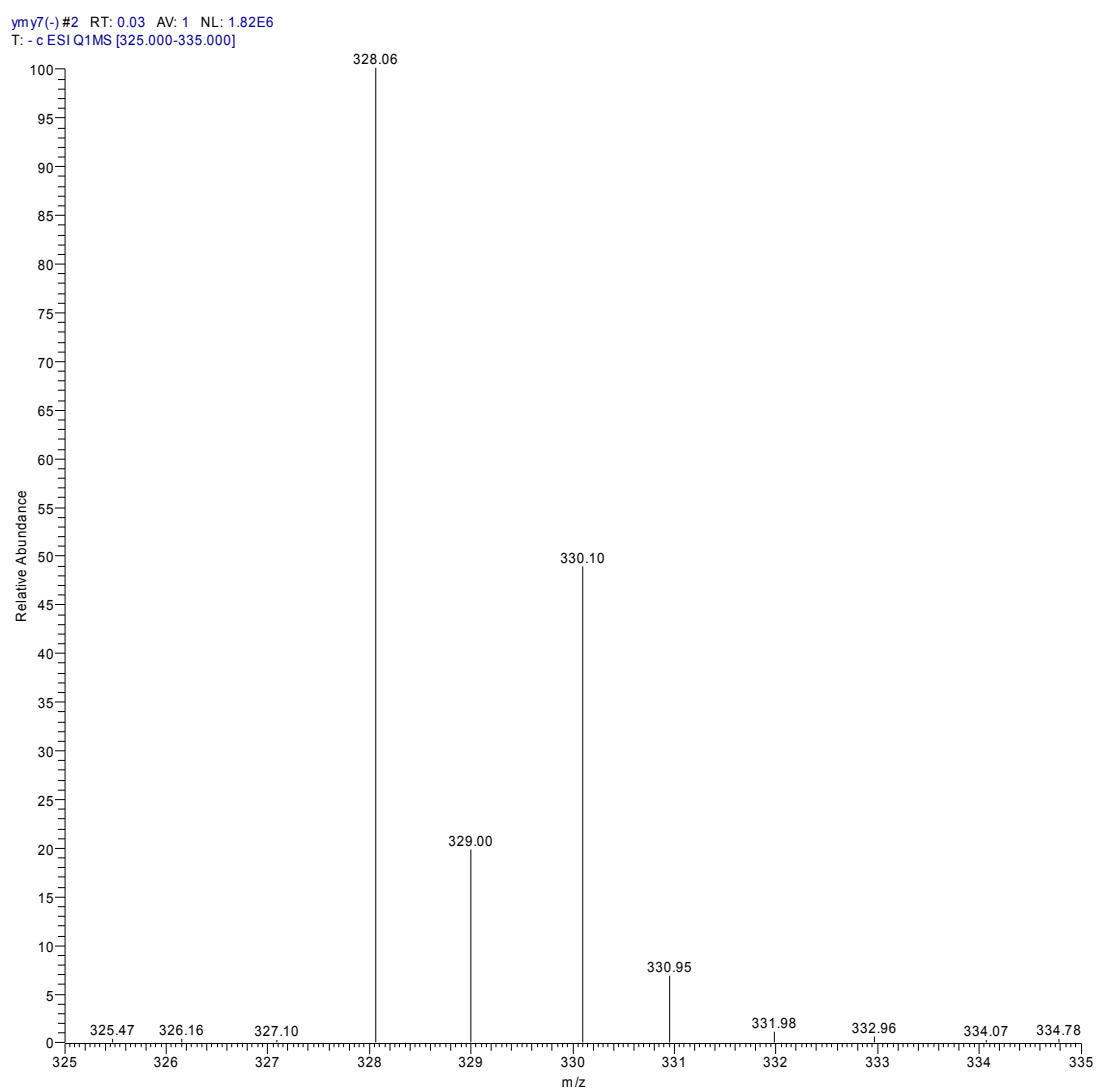

Figure S29. MS spectrum of compound 5g (-).

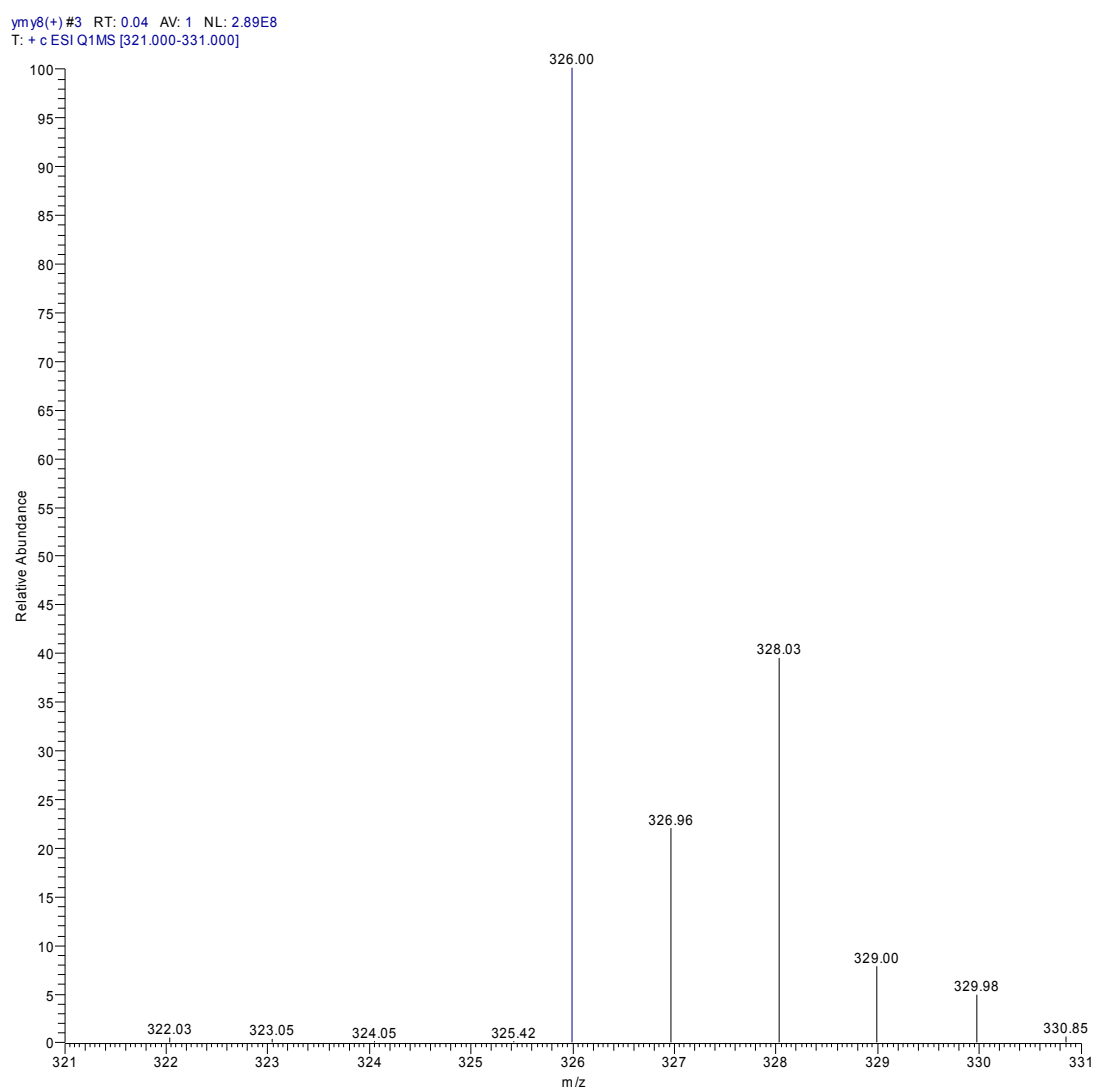

Figure S30. MS spectrum of compound 5h (+).

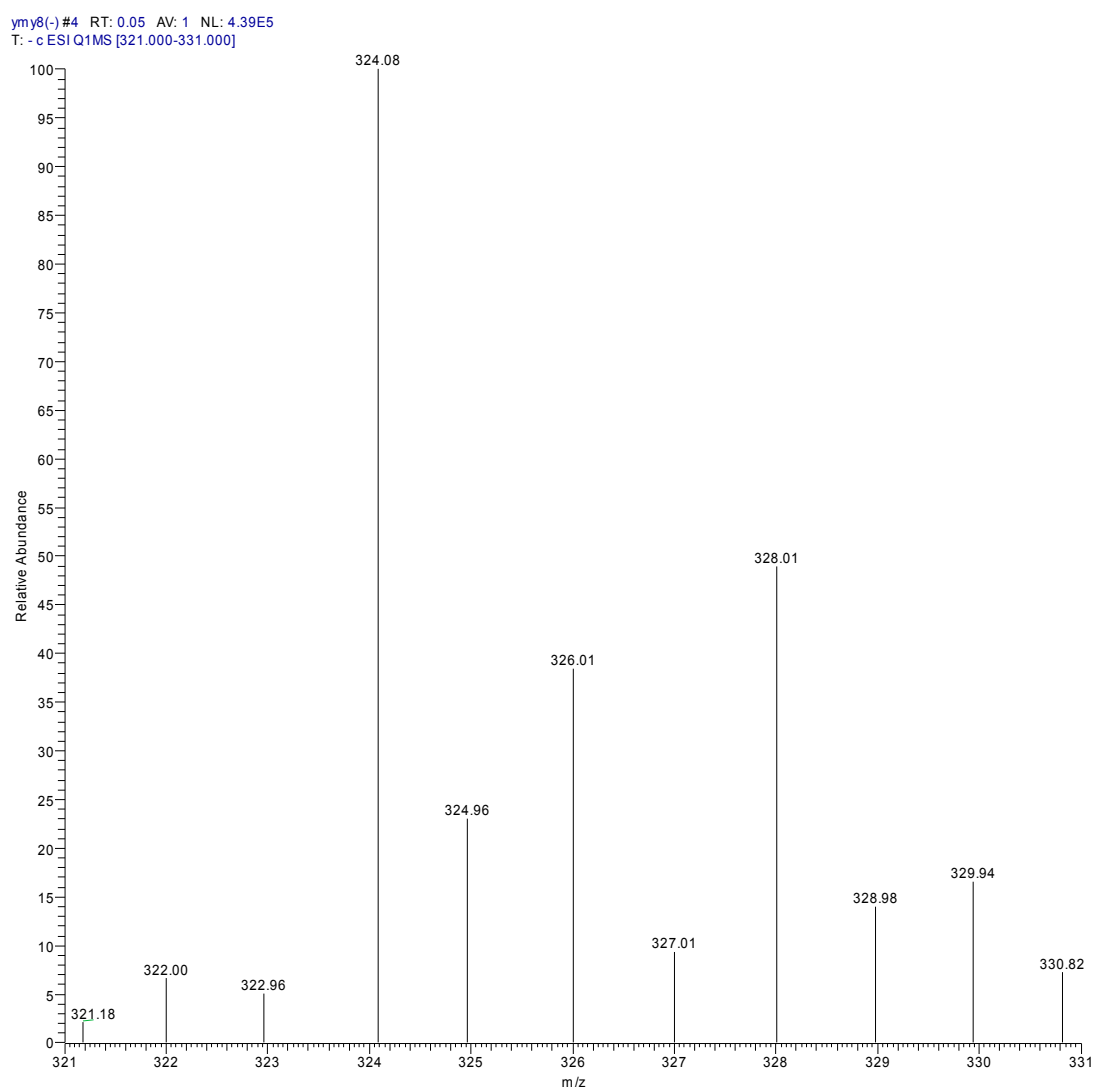

Figure S31. MS spectrum of compound 5h (-).

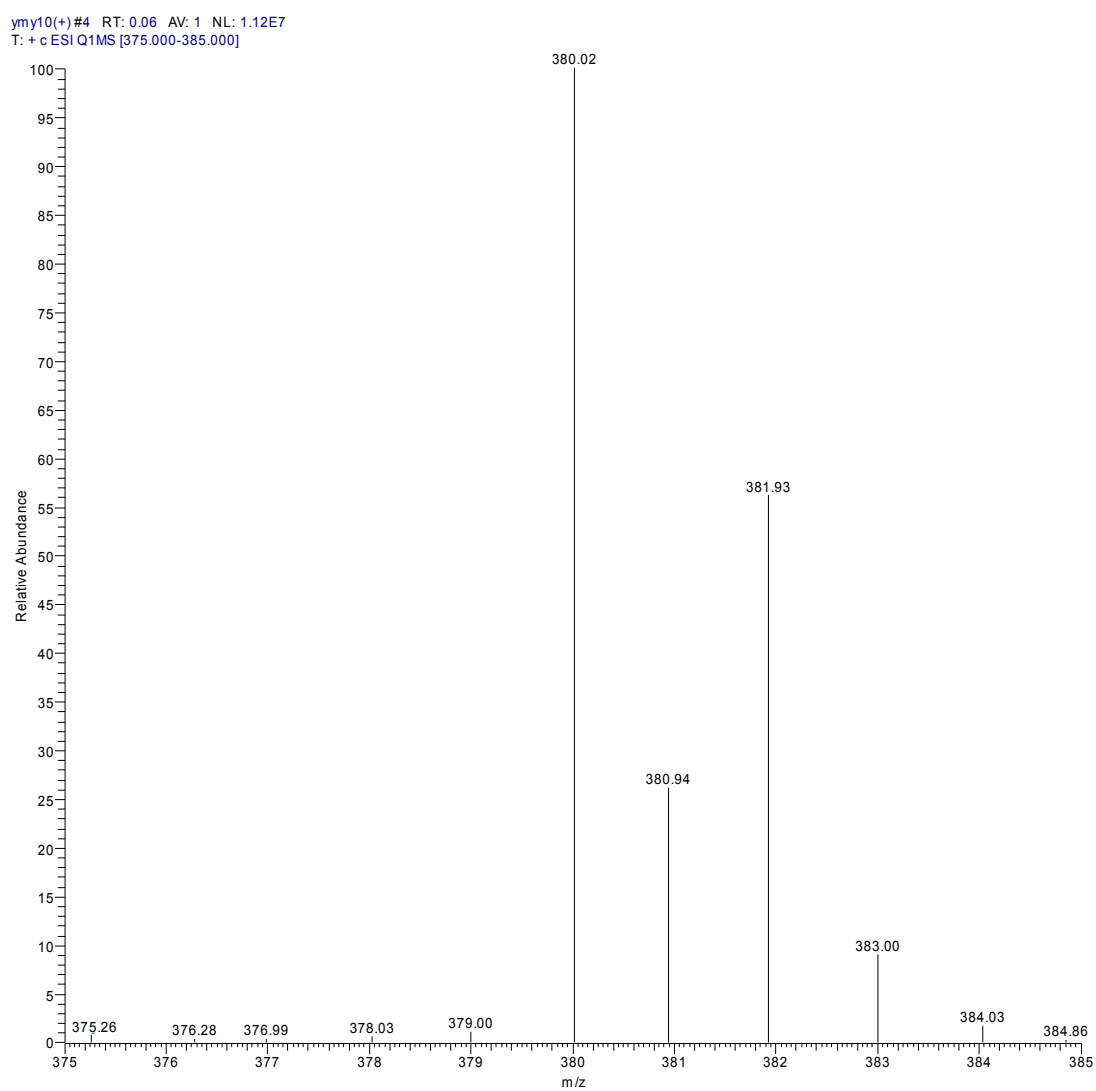

Figure S32. MS spectrum of compound **5i** (+).



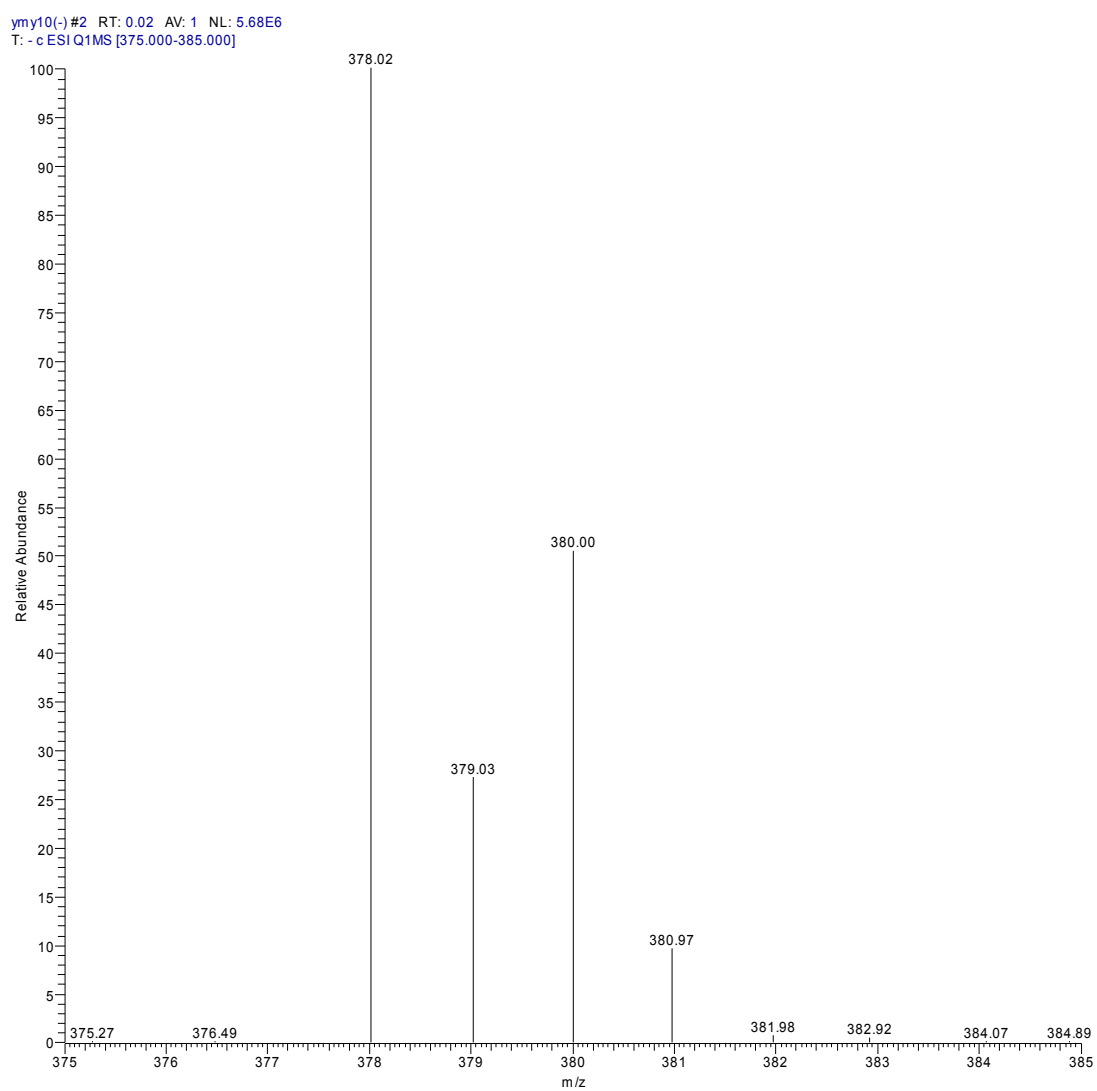

Figure S33. MS spectrum of compound **5i** (-).

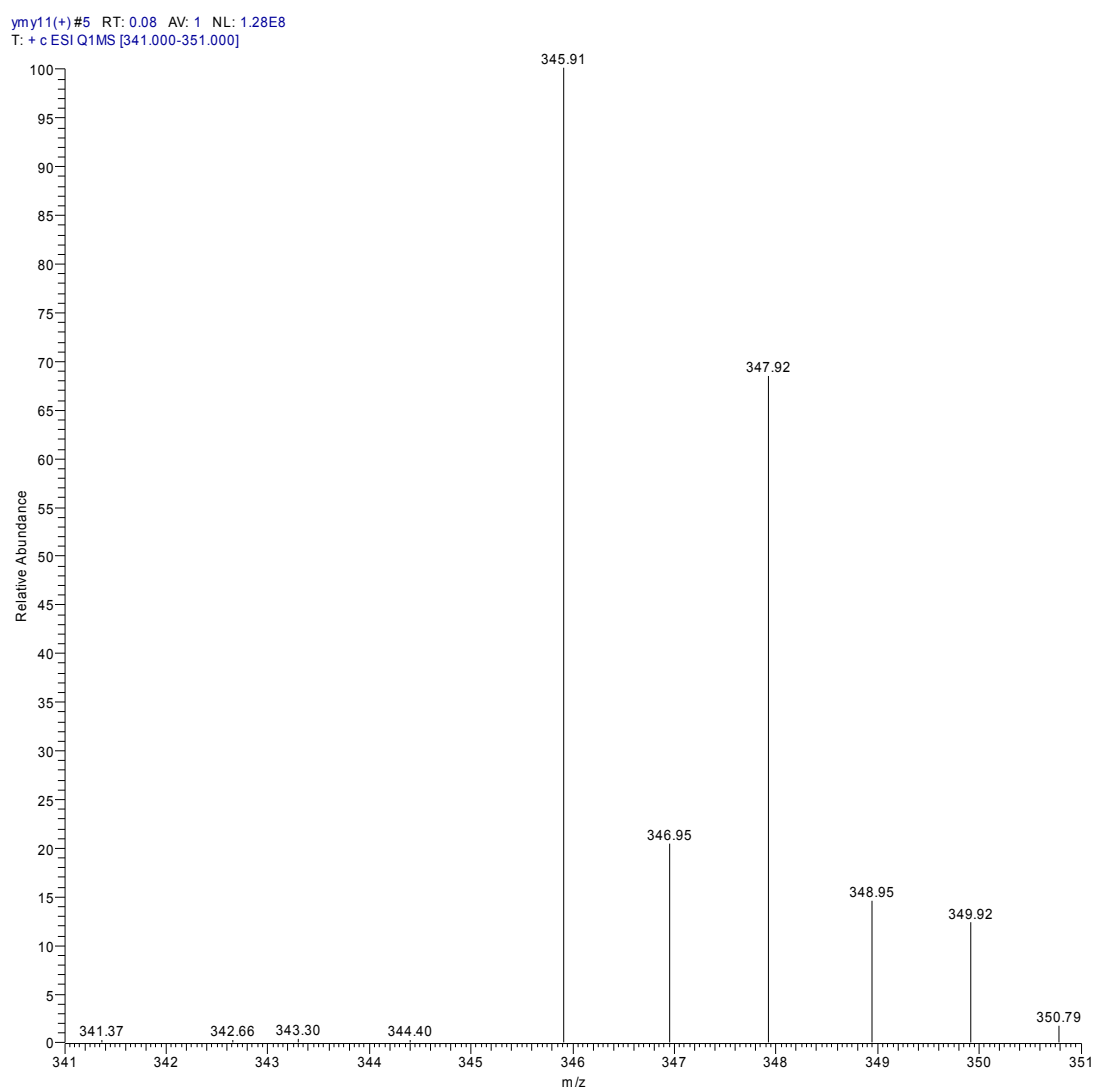

Figure S34. MS spectrum of compound 5j (+).

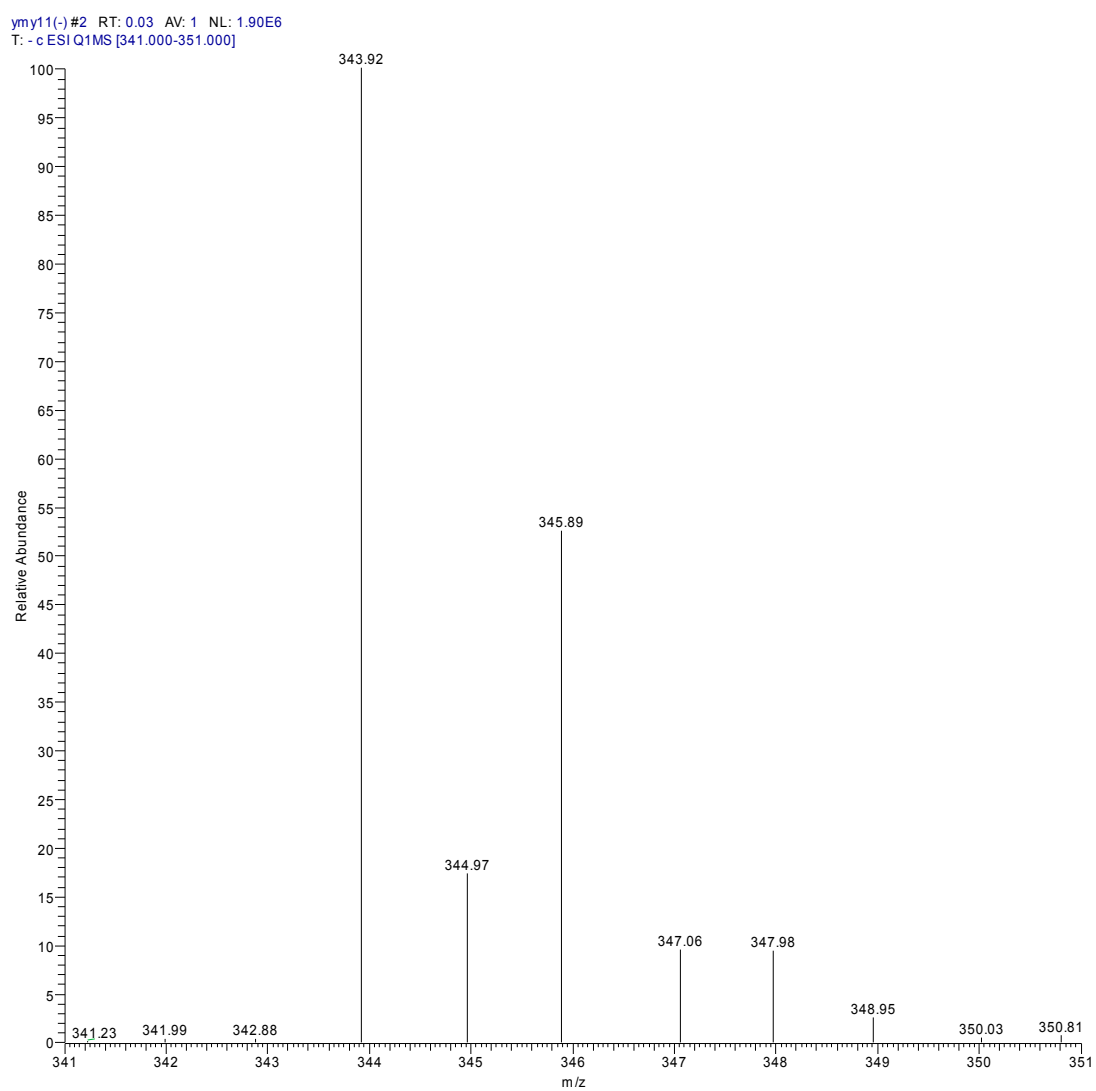

Figure S35. MS spectrum of compound 5j (-).

ymy12(+)#4 RT: 0.06 AV: 1 NL: 2.77E5  
T: + c ESI Q1MS [382.000-392.000]

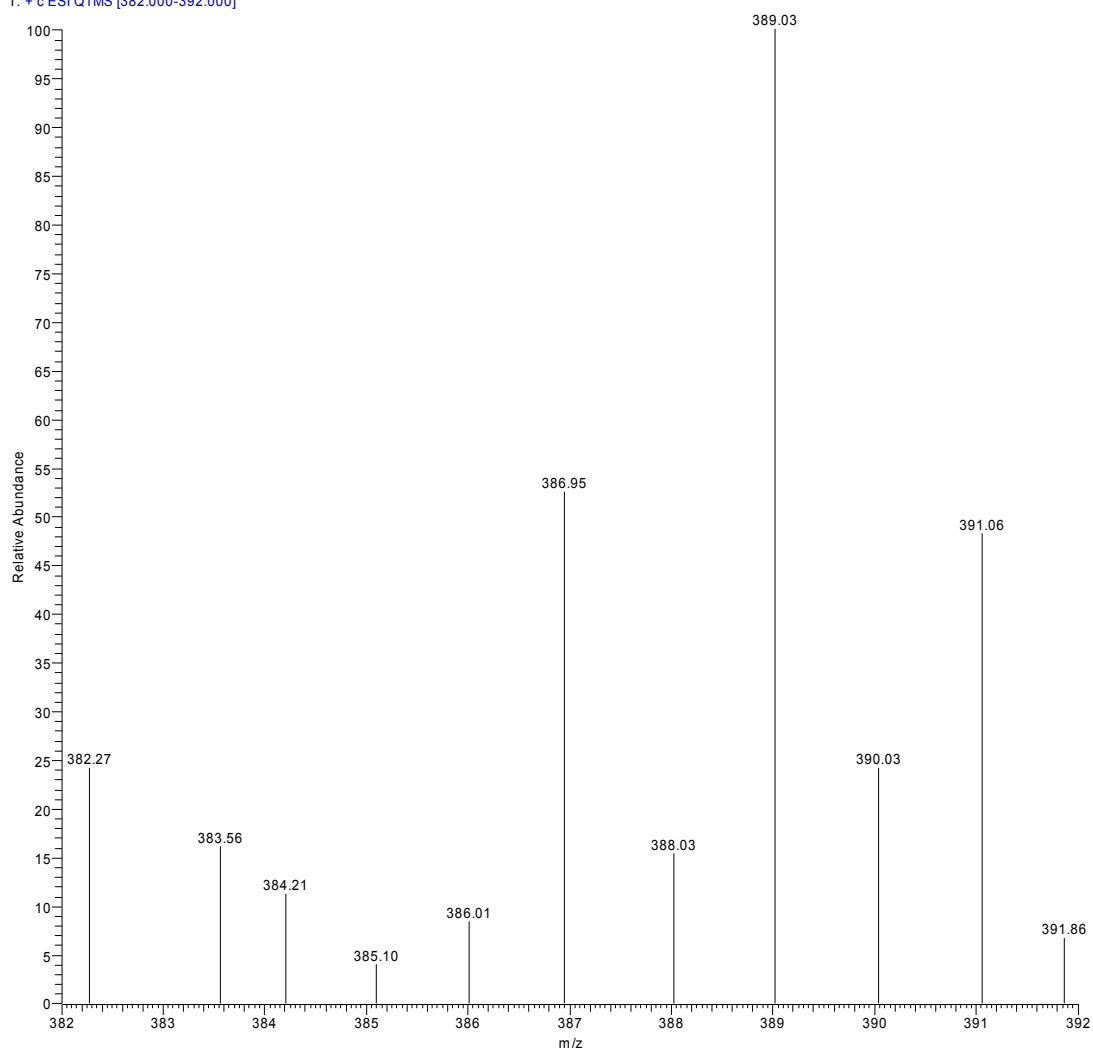

Figure S36. MS spectrum of compound 5k (+).

ymy12(-)#2 RT: 0.03 AV: 1 NL: 9.59E4  
T: -c ESI Q1MS [382.000-392.000]

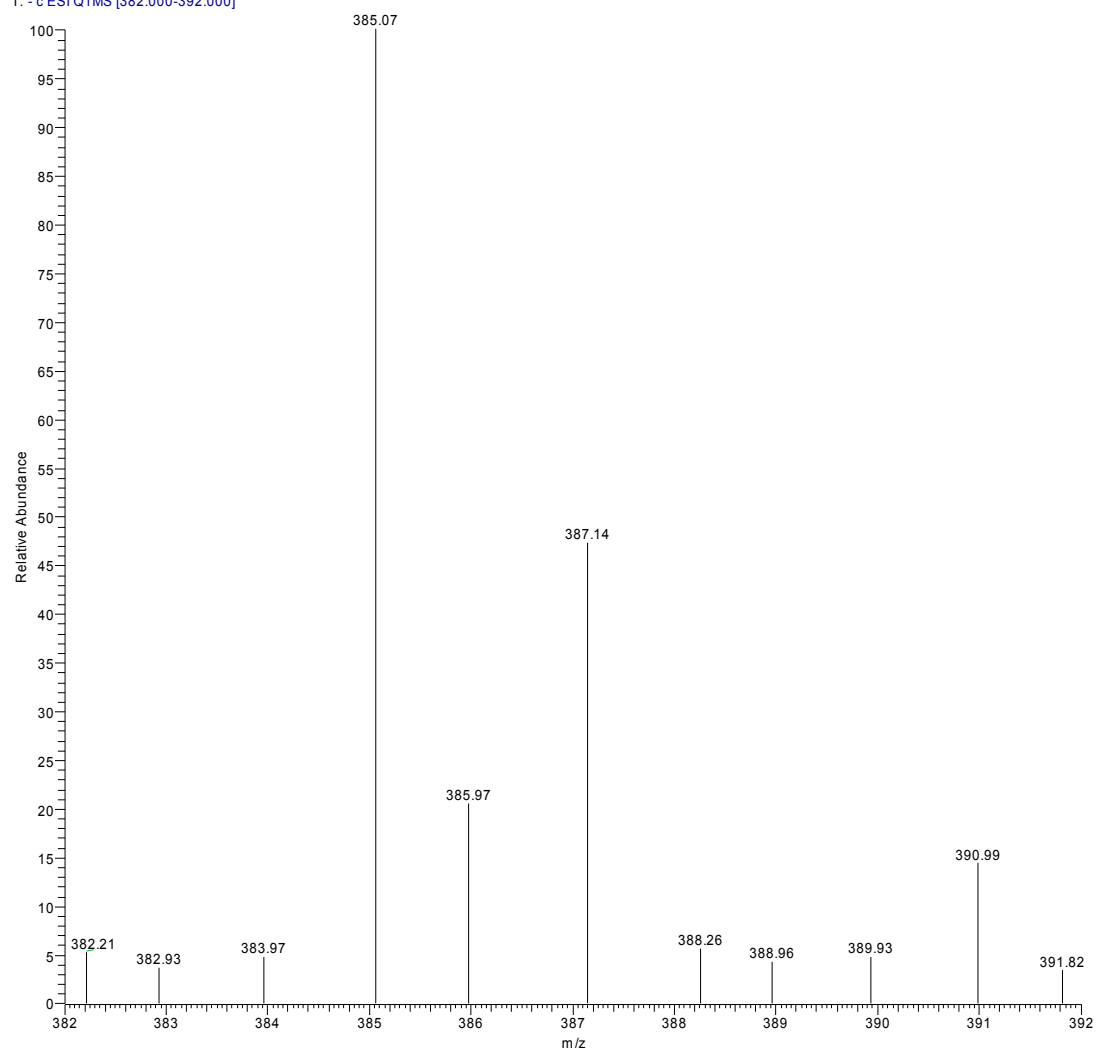

Figure S37. MS spectrum of compound 5k (-).

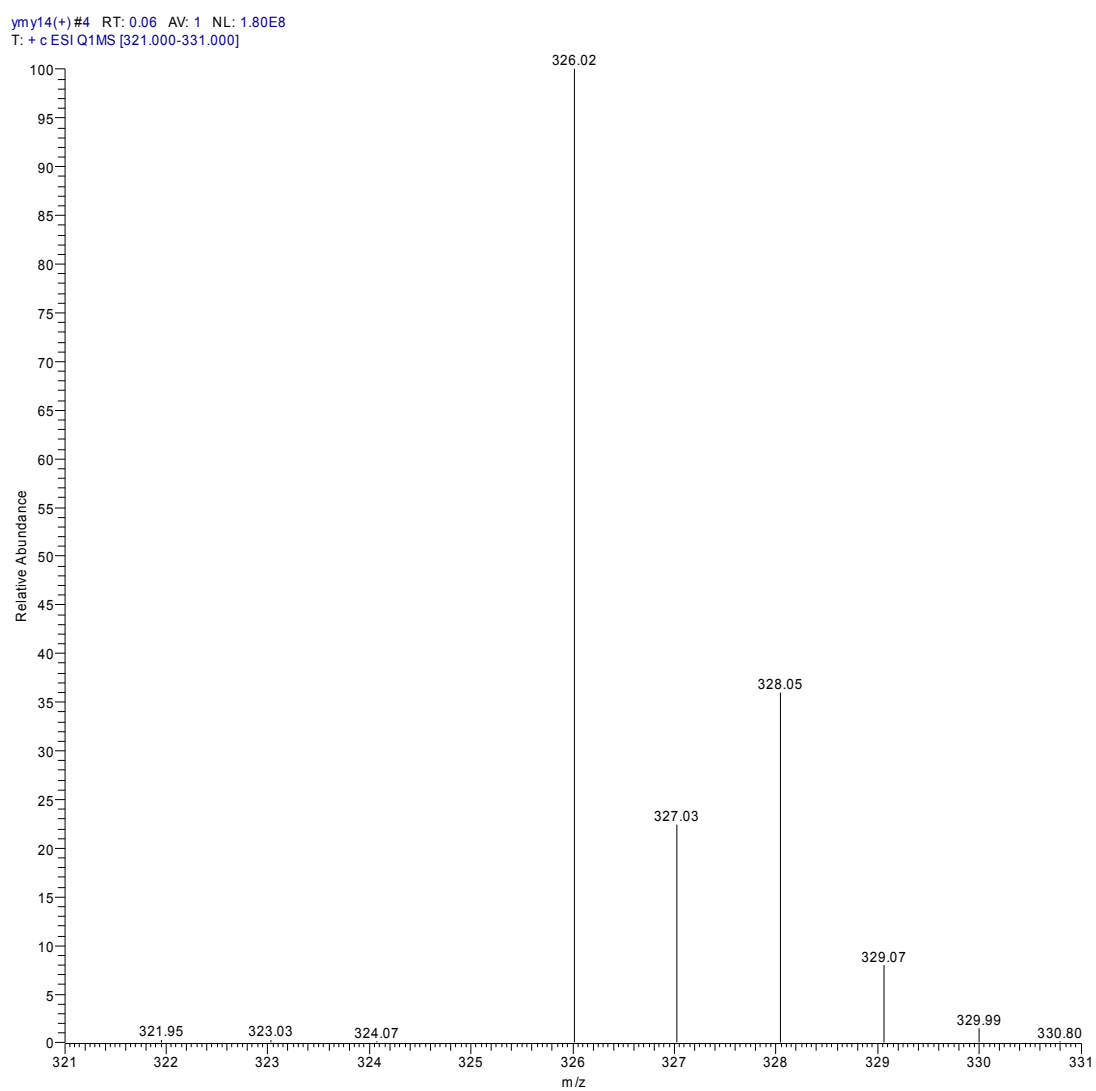

Figure S38. MS spectrum of compound 51 (+).

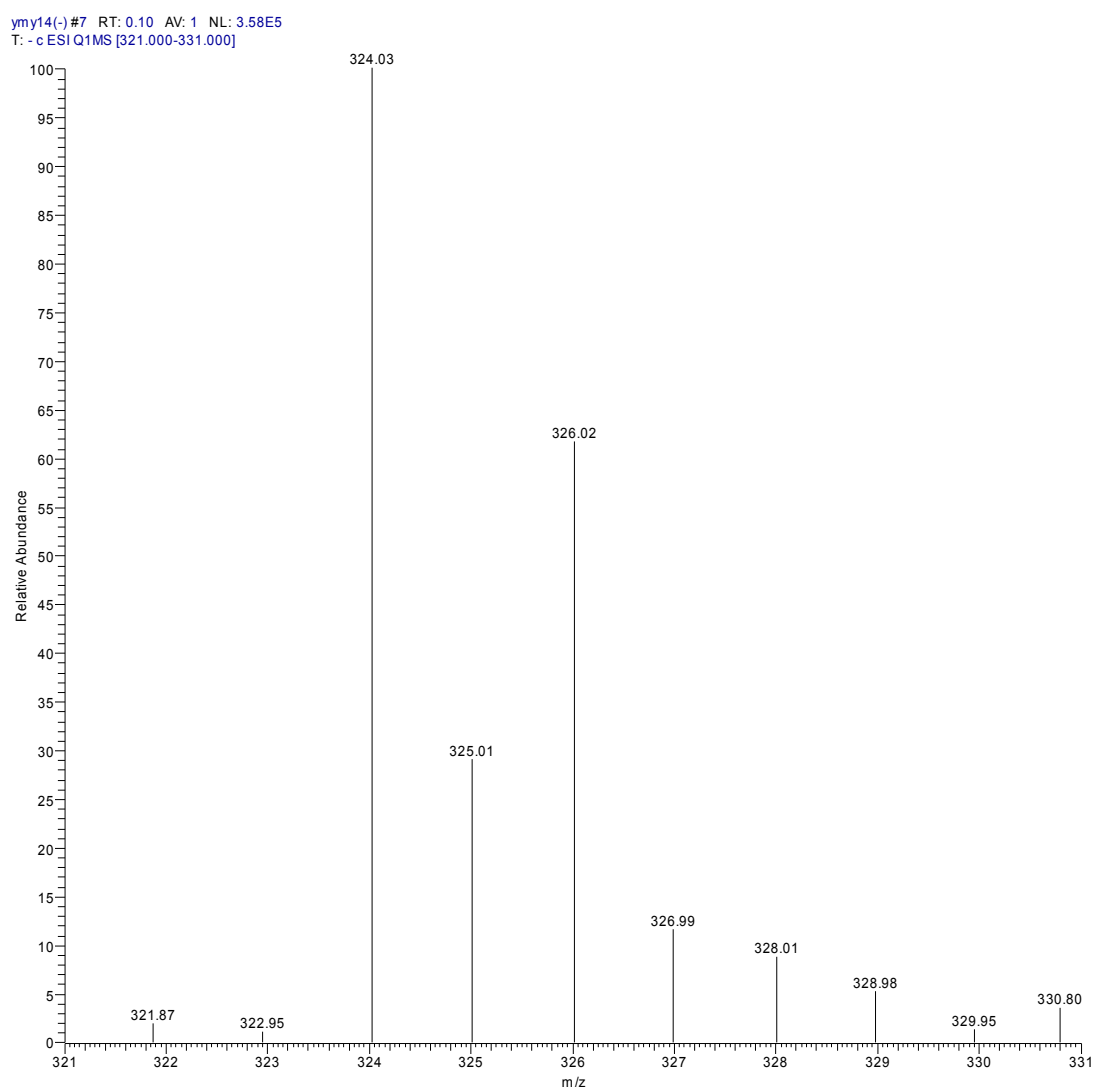

Figure S39. MS spectrum of compound 51 (-).

ymy15(+)#2 RT: 0.03 AV: 1 NL: 1.45E8  
T: + c ESI Q1MS [341.000-351.000]

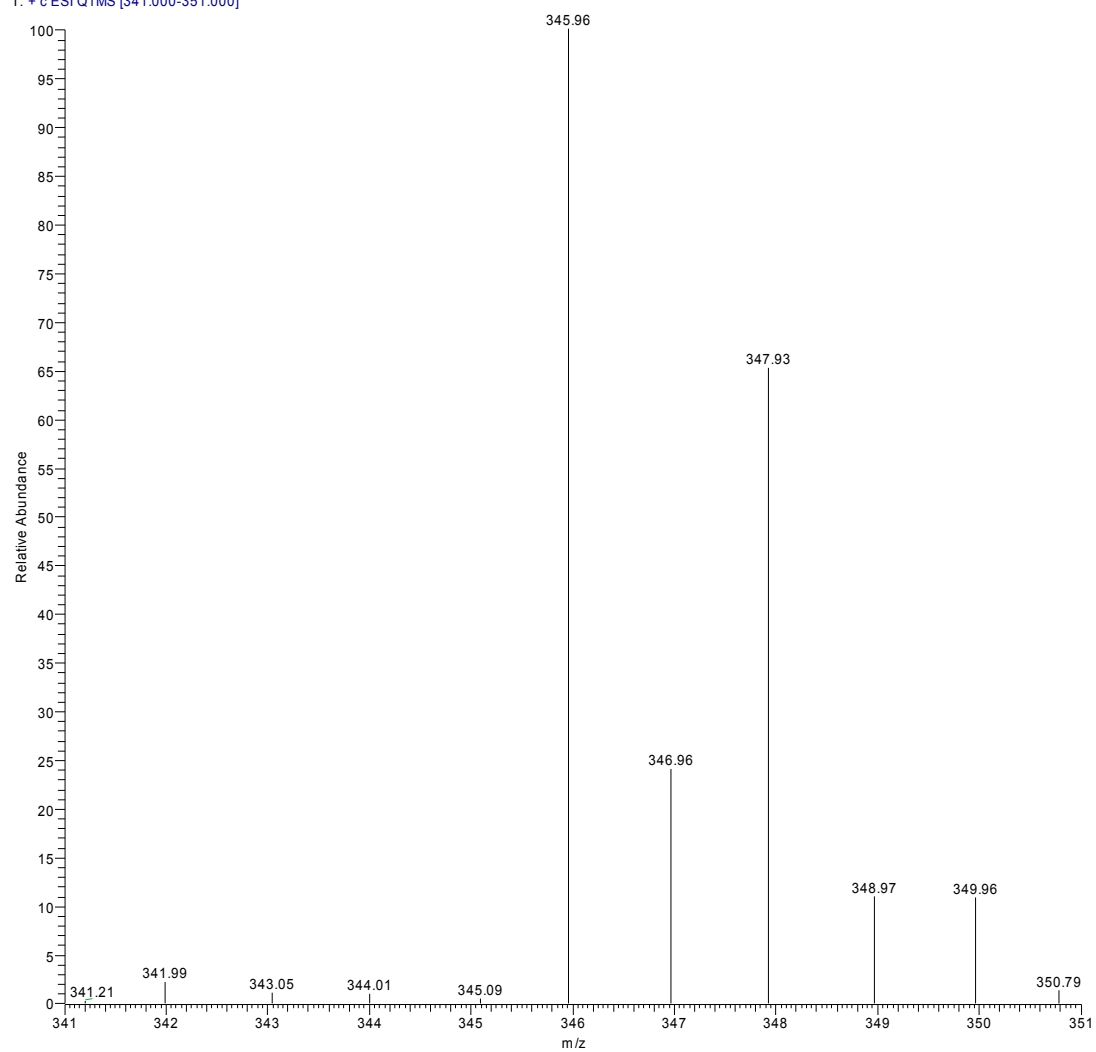

Figure S40. MS spectrum of compound 5m (+).



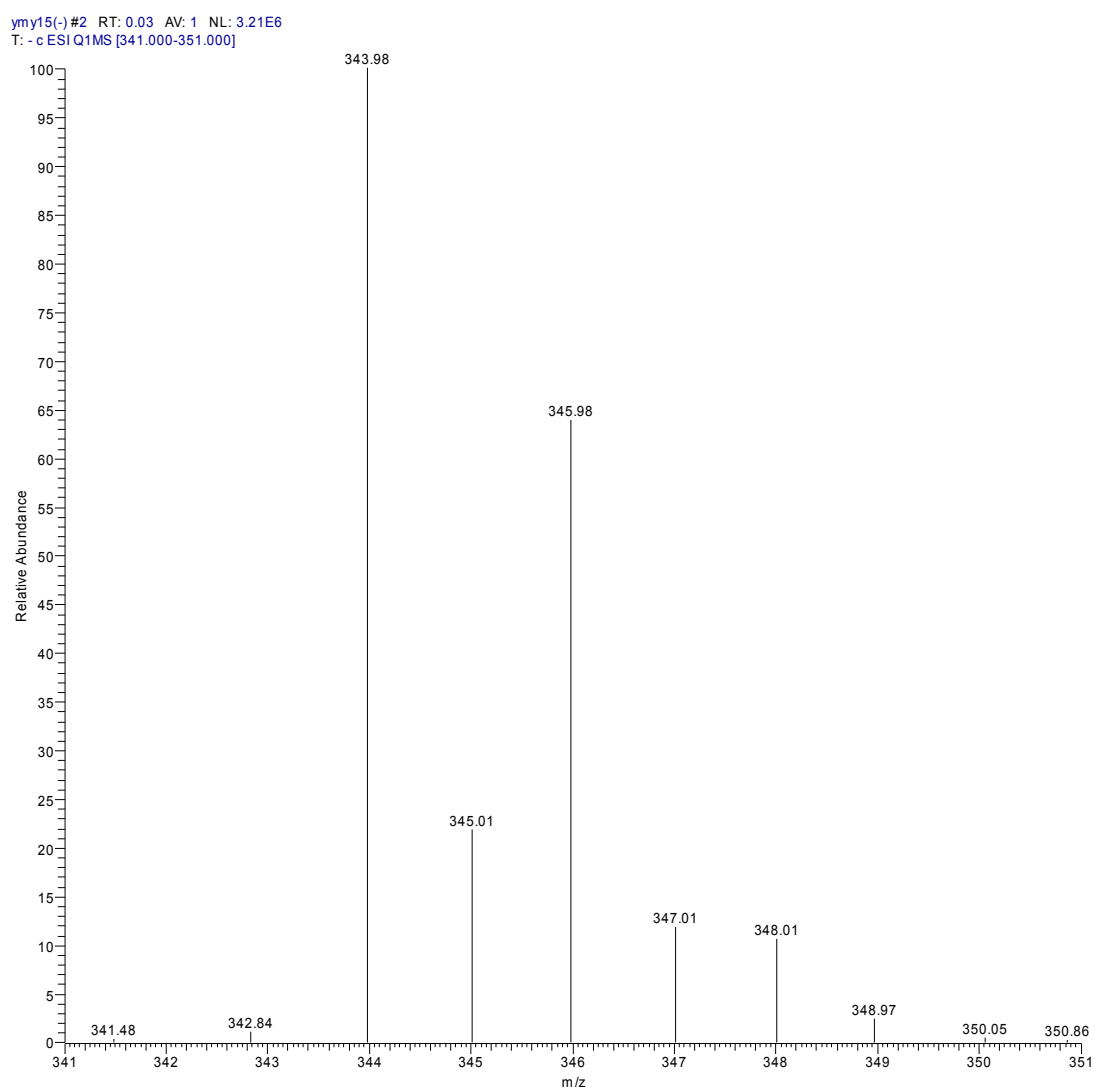

Figure S41. MS spectrum of compound 5m (-).
